# Supplementary material
Source: PubMed Central journal article supplement (PMC11113594)
Supplement: 18_2014_1661_MOESM1_ESM.pdf [file 18_2014_1661_MOESM1_ESM.pdf]

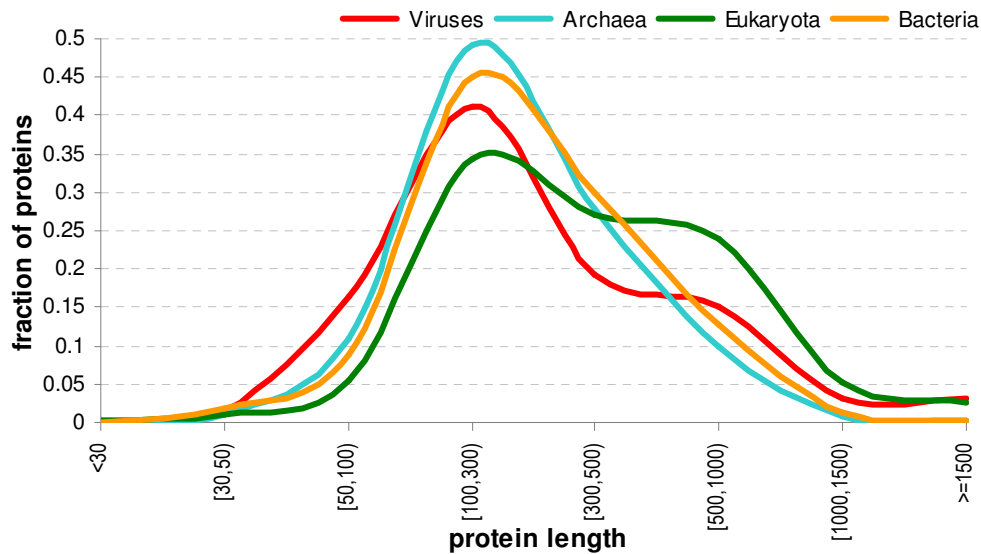

**Supplementary Figure 1.** Distribution of chain length across the four domains of life.

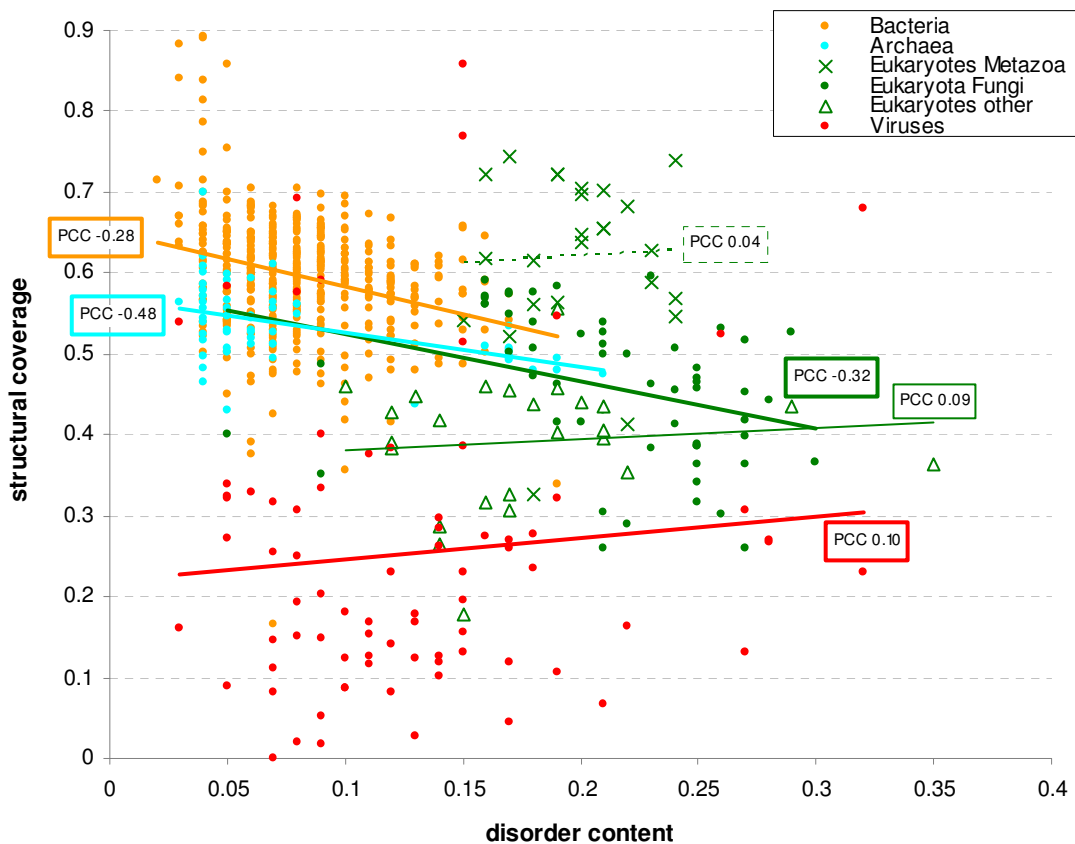

**Supplementary Figure 2.** Relation between structural coverage and disorder content across eukaryotic, bacterial, archaea, and viral species. The y-axis gives the structural coverage that is defined as a fraction of proteins in a given proteome that are similar to a fold with known structure [46]. Each point corresponds to a single proteome and data for proteomes in a given taxonomic kingdom (eukaryotic organisms were subdivided into animals, fungi and other) were fitted linearly; each fit is accompanied with the corresponding value of the Pearson Correlation Coefficient (PCC).

**Supplementary Table 1.** Summary of the complete proteomes collected from release 2011\_08 of UniProt. We use the taxonomic lineage from the NCBI that has the following the format: “domain”\_”second level”\_”third level”\_”leaf”. The small proteomes, with less than 30 proteins, are shown in italics; 224 of them are form viruses and 1 from eukaryota.

| Domain of life                                                                              | Taxonomic lineage                                                  | # proteins                                              |        |
|---------------------------------------------------------------------------------------------|--------------------------------------------------------------------|---------------------------------------------------------|--------|
| Archaea<br>231,466 proteins<br>59 species                                                   | Archaea_Crenarchaeota_Thermoprotei_ulfolobus                       | 35285                                                   |        |
|                                                                                             | Archaea_Euryarchaeota_Methanococci_Methanococcus                   | 11963                                                   |        |
|                                                                                             | Archaea_Euryarchaeota_Methanomicrobia_Methanosarcina               | 11387                                                   |        |
|                                                                                             | Archaea_Euryarchaeota_Thermococci_thermococcus                     | 10734                                                   |        |
|                                                                                             | Archaea_Crenarchaeota_Thermoprotei_Pyrobaculum                     | 9010                                                    |        |
|                                                                                             | Archaea_Euryarchaeota_Methanococci_Methanocaldococcus              | 8300                                                    |        |
|                                                                                             | Archaea_Euryarchaeota_Archaeoglobi_Archaeoglobus                   | 6281                                                    |        |
|                                                                                             | Archaea_Euryarchaeota_Thermococci_ycroccus                         | 5908                                                    |        |
|                                                                                             | Archaea_Euryarchaeota_Halobacteria_Halobacterium                   | 5041                                                    |        |
|                                                                                             | Archaea_Crenarchaeota_Thermoprotei_Vulcanisaeta                    | 4811                                                    |        |
|                                                                                             | Archaea_Euryarchaeota_Halobacteria_Haloarcula                      | 4234                                                    |        |
|                                                                                             | Archaea_Crenarchaeota_Thermoprotei_Thermoproteus                   | 4150                                                    |        |
|                                                                                             | Archaea_Euryarchaeota_Methanobacteria_Methanobrevibacter           | 3992                                                    |        |
|                                                                                             | Archaea_Euryarchaeota_Halobacteria_Haloferax                       | 3987                                                    |        |
|                                                                                             | Archaea_Euryarchaeota_Halobacteria_Halogeometricum                 | 3894                                                    |        |
|                                                                                             | Archaea_Euryarchaeota_Halobacteria_Halalkalicoccus                 | 3779                                                    |        |
|                                                                                             | Archaea_Euryarchaeota_Halobacteria_Haloterrigena                   | 3739                                                    |        |
|                                                                                             | Archaea_Euryarchaeota_Methanobacteria_Methanothermobacter          | 3625                                                    |        |
|                                                                                             | Archaea_Euryarchaeota_Halobacteria_Natrialba                       | 3558                                                    |        |
|                                                                                             | Archaea_Euryarchaeota_Halobacteria_Halorubrum                      | 3495                                                    |        |
|                                                                                             | Archaea_Euryarchaeota_Halobacteria_Halomicrobium                   | 3343                                                    |        |
|                                                                                             | Archaea_Crenarchaeota_Thermoprotei_Staphylothermus                 | 3169                                                    |        |
|                                                                                             | Archaea_Euryarchaeota_Methanomicrobia_Methanospirillum             | 3087                                                    |        |
|                                                                                             | Archaea_Euryarchaeota_environmental samples_environmental samples  | 3071                                                    |        |
|                                                                                             | Archaea_Euryarchaeota_Thermoplasmata_Thermoplasma                  | 3005                                                    |        |
|                                                                                             | Archaea_Euryarchaeota_Halobacteria_Halorhabdus                     | 2998                                                    |        |
|                                                                                             | Archaea_Euryarchaeota_Methanomicrobia_Methanocella                 | 2993                                                    |        |
|                                                                                             | Archaea_Crenarchaeota_Thermoprotei_Desulfurococcus                 | 2815                                                    |        |
|                                                                                             | Archaea_Euryarchaeota_Halobacteria_Natronomonas                    | 2784                                                    |        |
|                                                                                             | Archaea_Euryarchaeota_Methanomicrobia_Methanoplanus                | 2779                                                    |        |
|                                                                                             | Archaea_Euryarchaeota_Methanomicrobia_Methanosphaerula             | 2655                                                    |        |
|                                                                                             | Archaea_Euryarchaeota_Halobacteria_Haloquadratum                   | 2645                                                    |        |
|                                                                                             | Archaea_Euryarchaeota_Methanobacteria_Methanobacterium             | 2493                                                    |        |
|                                                                                             | Archaea_Euryarchaeota_Methanomicrobia_Methanoculleus               | 2476                                                    |        |
|                                                                                             | Archaea_Euryarchaeota_Archaeoglobi_Ferroglobus                     | 2463                                                    |        |
|                                                                                             | Archaea_Euryarchaeota_Methanomicrobia_Methanoregula                | 2450                                                    |        |
|                                                                                             | Archaea_Crenarchaeota_Thermoprotei_etallosphaera                   | 2256                                                    |        |
|                                                                                             | Archaea_Euryarchaeota_Methanomicrobia_Methanohalobium              | 2250                                                    |        |
|                                                                                             | Archaea_Euryarchaeota_Methanomicrobia_Methanococcoides             | 2242                                                    |        |
|                                                                                             | Archaea_Thaumarchaeota_Cenarchaeales_Cenarchaeum                   | 2022                                                    |        |
|                                                                                             | Archaea_Euryarchaeota_Methanomicrobia_Methanohalophilus            | 1986                                                    |        |
|                                                                                             | Archaea_Crenarchaeota_Thermoprotei_Caldivirga                      | 1962                                                    |        |
|                                                                                             | Archaea_Crenarchaeota_Thermoprotei_Ignisphaera                     | 1929                                                    |        |
|                                                                                             | Archaea_Crenarchaeota_Thermoprotei_hermoifilum                     | 1876                                                    |        |
|                                                                                             | Archaea_Thaumarchaeota_marine archaeal group_Nitrosopumilus        | 1795                                                    |        |
|                                                                                             | Archaea_Euryarchaeota_Methanomicrobia_Methanocorpusculum           | 1739                                                    |        |
|                                                                                             | Archaea_Crenarchaeota_Thermoprotei_Aeropyrum                       | 1700                                                    |        |
|                                                                                             | Archaea_Euryarchaeota_Methanopyri_ethanopyrus                      | 1687                                                    |        |
|                                                                                             | Archaea_Euryarchaeota_Methanomicrobia_Methanoseta                  | 1673                                                    |        |
|                                                                                             | Archaea_Crenarchaeota_Thermoprotei_Hyperthermus                    | 1602                                                    |        |
|                                                                                             | Archaea_Korarchaeota_Candidatus_Korarchaeum_Candidatus_Korarchaeum | 1602                                                    |        |
|                                                                                             | Archaea_Euryarchaeota_Aciduliprofundum_Aciduliprofundum            | 1539                                                    |        |
|                                                                                             | Archaea_Euryarchaeota_Thermoplasmata_Picrophilus                   | 1535                                                    |        |
|                                                                                             | Archaea_Euryarchaeota_Methanobacteria_Methanosphaera               | 1533                                                    |        |
|                                                                                             | Archaea_Crenarchaeota_Thermoprotei_cidilobus                       | 1499                                                    |        |
|                                                                                             | Archaea_Crenarchaeota_Thermoprotei_Ignicoccus                      | 1434                                                    |        |
|                                                                                             | Archaea_Crenarchaeota_Thermoprotei_Thermosphaera                   | 1387                                                    |        |
|                                                                                             | Archaea_Euryarchaeota_Methanobacteria_Methanothermus               | 1283                                                    |        |
|                                                                                             | Archaea_Nanoarchaeota_Nanoarchaeum_Nanoarchaeum                    | 536                                                     |        |
|                                                                                             | Bacteria<br>4,285,619 proteins<br>471 species                      | Bacteria_Proteobacteria_Gammaproteobacteria_Escherichia | 186023 |
|                                                                                             |                                                                    | Bacteria_Firmicutes_Clostridia_lostridium               | 112965 |
|                                                                                             |                                                                    | Bacteria_Firmicutes_Lactobacillales_treptococcus        | 112892 |
|                                                                                             |                                                                    | Bacteria_Firmicutes_Bacillales_acillus cereus group     | 104365 |
|                                                                                             |                                                                    | Bacteria_Proteobacteria_Gammaproteobacteria_Pseudomonas | 97486  |
|                                                                                             |                                                                    | Bacteria_Proteobacteria_Gammaproteobacteria_Shewanella  | 93221  |
|                                                                                             |                                                                    | Bacteria_Firmicutes_Bacillales_Staphylococcus           | 80809  |
|                                                                                             |                                                                    | Bacteria_Proteobacteria_Gammaproteobacteria_Yersinia    | 65501  |
| Bacteria_Firmicutes_Lactobacillales_actobacillus                                            |                                                                    | 63404                                                   |        |
| Bacteria_Firmicutes_Bacillales_Bacillus                                                     |                                                                    | 63102                                                   |        |
| Bacteria_Proteobacteria_Betaproteobacteria_Burkholderia cepacia complex                     |                                                                    | 62954                                                   |        |
| Bacteria_Actinobacteria_Actinobacteridae_Streptomyces                                       |                                                                    | 55172                                                   |        |
| Bacteria_Actinobacteria_Actinobacteridae_Mycobacterium                                      |                                                                    | 53229                                                   |        |
| Bacteria_Proteobacteria_Betaproteobacteria_pseudomallei group                               |                                                                    | 51766                                                   |        |
| Bacteria_Proteobacteria_Alphaproteobacteria_Methylobacterium                                |                                                                    | 48739                                                   |        |
| Bacteria_Proteobacteria_Gammaproteobacteria_Vibrio                                          |                                                                    | 48534                                                   |        |
| Bacteria_Proteobacteria_Betaproteobacteria_Burkholderia                                     |                                                                    | 45617                                                   |        |
| Bacteria_Proteobacteria_Epsilonproteobacteria_Helicobacter                                  |                                                                    | 44727                                                   |        |
| Bacteria_Proteobacteria_Gammaproteobacteria_Xanthomonas                                     |                                                                    | 38118                                                   |        |
| Bacteria_Proteobacteria_Alphaproteobacteria_Brucella                                        |                                                                    | 34544                                                   |        |
| Bacteria_Proteobacteria_Deltaproteobacteria_Geobacter                                       |                                                                    | 34413                                                   |        |
| Bacteria_Proteobacteria_Alphaproteobacteria_Rhodospseudomonas                               |                                                                    | 33748                                                   |        |
| Bacteria_Proteobacteria_Betaproteobacteria_Neisseria                                        |                                                                    | 33450                                                   |        |
| Bacteria_Proteobacteria_Alphaproteobacteria_Rhizobium                                       |                                                                    | 32453                                                   |        |
| Bacteria_Proteobacteria_Gammaproteobacteria_cinetobacter calcoaceticus or baumannii complex |                                                                    | 32317                                                   |        |
| Bacteria_Proteobacteria_Gammaproteobacteria_Salmonella                                      |                                                                    | 31476                                                   |        |

|                                                                               |       |
|-------------------------------------------------------------------------------|-------|
| Bacteria_Cyanobacteria_Chroococcales_Cyanothece                               | 31426 |
| Bacteria_Proteobacteria_Deltaproteobacteria_Desulfovibrio                     | 30808 |
| Bacteria_Actinobacteria_Actinobacteridae_Bifidobacterium                      | 29624 |
| Bacteria_Cyanobacteria_Chroococcales_Synechococcus                            | 29330 |
| Bacteria_Actinobacteria_Actinobacteridae_Corynebacterium                      | 29106 |
| Bacteria_Proteobacteria_Gammaproteobacteria_Shigella                          | 28961 |
| Bacteria_Firmicutes_Bacillales_Listeria                                       | 28862 |
| Bacteria_Actinobacteria_Actinobacteridae_ycobacterium tuberculosis complex    | 28848 |
| Bacteria_Bacteroidetes_Bacteroidia_acteroides                                 | 28718 |
| Bacteria_Actinobacteria_Actinobacteridae_Rhodococcus                          | 28245 |
| Bacteria_Proteobacteria_Gammaproteobacteria_Erwinia                           | 27018 |
| Bacteria_Cyanobacteria_Prochlorophytes_rochlorococcus                         | 25477 |
| Bacteria_Actinobacteria_Actinobacteridae_Frankia                              | 25363 |
| Bacteria_Proteobacteria_Betaproteobacteria_Cupriavidus                        | 25249 |
| Bacteria_Proteobacteria_Epsilonproteobacteria_Campylobacter                   | 24076 |
| Bacteria_Tenericutes_Mollicutes_Mycoplasma                                    | 23996 |
| Bacteria_Firmicutes_Bacillales_Geobacillus                                    | 23737 |
| Bacteria_Firmicutes_Bacillales_Paenibacillus                                  | 23259 |
| Bacteria_Proteobacteria_Alphaproteobacteria_Agrobacterium                     | 22701 |
| Bacteria_Proteobacteria_Alphaproteobacteria_Bradyrhizobium                    | 22521 |
| Bacteria_Actinobacteria_Actinobacteridae_Arthrobacter                         | 21066 |
| Bacteria_Proteobacteria_Betaproteobacteria_Bordetella                         | 20667 |
| Bacteria_Proteobacteria_Alphaproteobacteria_Rhodobacter                       | 20618 |
| Bacteria_Spirochaetes_Spirochaetales_Leptospira                               | 20349 |
| Bacteria_Proteobacteria_Gammaproteobacteria_almonella enterica subsp          | 19509 |
| Bacteria_Proteobacteria_Gammaproteobacteria_Salmonella typhimurium            | 19174 |
| Bacteria_Proteobacteria_Gammaproteobacteria_Legionella                        | 18841 |
| Bacteria_Proteobacteria_Alphaproteobacteria_Sinorhizobium                     | 18588 |
| Bacteria_Proteobacteria_Gammaproteobacteria_Pantoea                           | 18373 |
| Bacteria_Proteobacteria_Gammaproteobacteria_Haemophilus                       | 17730 |
| Bacteria_Proteobacteria_Deltaproteobacteria_Anaeromyxobacter                  | 17710 |
| Bacteria_Proteobacteria_Alphaproteobacteria_Caulobacter                       | 17080 |
| Bacteria_Firmicutes_Clostridia_aldicellulosiruptor                            | 17039 |
| Bacteria_Proteobacteria_Betaproteobacteria_Acidovorax                         | 16826 |
| Bacteria_Proteobacteria_Gammaproteobacteria_Dickeya                           | 16765 |
| Bacteria_Proteobacteria_Gammaproteobacteria_Francisella                       | 16023 |
| Bacteria_Proteobacteria_Gammaproteobacteria_Klebsiella                        | 15920 |
| Bacteria_Deinococcus-Thermus_Deinococci_Deinococcus                           | 15264 |
| Bacteria_Proteobacteria_Betaproteobacteria_Ralstonia                          | 15227 |
| Bacteria_Chlamydiae_Chlamydiales_Chlamydia                                    | 14444 |
| Bacteria_Firmicutes_Lactobacillales_Lactococcus                               | 14319 |
| Bacteria_Proteobacteria_Alphaproteobacteria_Mesorhizobium                     | 13518 |
| Bacteria_Firmicutes_Clostridia_Thermoanaerobacter                             | 13402 |
| Bacteria_Proteobacteria_Gammaproteobacteria_Pectobacterium                    | 13135 |
| Bacteria_Cyanobacteria_Nostocales_Nostoc                                      | 12643 |
| Bacteria_Actinobacteria_Actinobacteridae_Micromonospora                       | 12330 |
| Bacteria_Chloroflexi_Chloroflexales_Chloroflexus                              | 11728 |
| Bacteria_Proteobacteria_Gammaproteobacteria_Pseudoalteromonas                 | 11451 |
| Bacteria_Proteobacteria_Gammaproteobacteria_Aliivibrio                        | 11361 |
| Bacteria_Thermotogae_Thermotogales_Thermotoga                                 | 11196 |
| Bacteria_Proteobacteria_Gammaproteobacteria_Xylella                           | 11181 |
| Bacteria_Chlorobi_Chlorobia_Chlorobium                                        | 11168 |
| Bacteria_Firmicutes_Clostridia_ubacterium                                     | 10802 |
| Bacteria_Proteobacteria_Gammaproteobacteria_Edwardsiella                      | 10544 |
| Bacteria_Proteobacteria_Betaproteobacteria_Polaromonas                        | 10316 |
| Bacteria_Firmicutes_Clostridia_esulfitobacterium                              | 9866  |
| Bacteria_Proteobacteria_Gammaproteobacteria_Citrobacter                       | 9811  |
| Bacteria_Proteobacteria_Gammaproteobacteria_Enterobacter cloacae complex      | 9804  |
| Bacteria_Proteobacteria_Alphaproteobacteria_spotted fever group               | 9723  |
| Bacteria_Proteobacteria_Gammaproteobacteria_Nitrosococcus                     | 9534  |
| Bacteria_Proteobacteria_Gammaproteobacteria_Coxiella                          | 9481  |
| Bacteria_Spirochaetes_Spirochaetales_Spirochaeta                              | 9417  |
| Bacteria_Actinobacteria_Actinobacteridae_Salinispora                          | 9370  |
| Bacteria_Actinobacteria_Actinobacteridae_ycobacterium avium complex (MAC)     | 9356  |
| Bacteria_Proteobacteria_Deltaproteobacteria_Sorangium                         | 9320  |
| Bacteria_Actinobacteria_Actinobacteridae_Amycolatopsis                        | 9204  |
| Bacteria_Plactomycetes_Plactomycetacia_Plactomyces                            | 8968  |
| Bacteria_Actinobacteria_Actinobacteridae_Streptosporangium                    | 8926  |
| Bacteria_Actinobacteria_Actinobacteridae_Catenulispora                        | 8909  |
| Bacteria_Proteobacteria_Gammaproteobacteria_Photorhabdus                      | 8906  |
| Bacteria_Proteobacteria_Gammaproteobacteria_Cronobacter                       | 8871  |
| Bacteria_Proteobacteria_Alphaproteobacteria_Bartonella                        | 8838  |
| Bacteria_Firmicutes_Lactobacillales_Enterococcus                              | 8829  |
| Bacteria_Chloroflexi_Chloroflexales_Roseiflexus                               | 8818  |
| Bacteria_Proteobacteria_Gammaproteobacteria_Marinobacter                      | 8577  |
| Bacteria_Proteobacteria_Gammaproteobacteria_arinomonas                        | 8534  |
| Bacteria_Proteobacteria_Gammaproteobacteria_Aeromonas                         | 8448  |
| Bacteria_Proteobacteria_Gammaproteobacteria_tenotrophomonas maltophilia group | 8395  |
| Bacteria_Proteobacteria_Gammaproteobacteria_Xenorhabdus                       | 8377  |
| Bacteria_Proteobacteria_Deltaproteobacteria_Stigmatella                       | 8307  |
| Bacteria_Proteobacteria_Gammaproteobacteria_Actinobacillus                    | 8220  |
| Bacteria_Spirochaetes_Spirochaetales_Treponema                                | 8203  |
| Bacteria_Cyanobacteria_Acaryochloris_Acaryochloris                            | 8172  |
| Bacteria_Proteobacteria_Alphaproteobacteria_Ruegeria                          | 8091  |
| Bacteria_Bacteroidetes_Sphingobacteria_Pedobacter                             | 8029  |
| Bacteria_Spirochaetes_Spirochaetales_orrelia burgdorferi group                | 7894  |
| Bacteria_Acidobacteria_Acidobacteriales_cidobacterium                         | 7877  |
| Bacteria_Firmicutes_Lactobacillales_Leuconostoc                               | 7842  |
| Bacteria_Proteobacteria_Alphaproteobacteria_Rhodospirillum                    | 7819  |
| Bacteria_Acidobacteria_Solibacteres_Candidatus Solibacter                     | 7761  |
| Bacteria_Spirochaetes_Spirochaetales_Brachyspira                              | 7694  |
| Bacteria_Chlamydiae_Chlamydiales_Chlamydomyces                                | 7550  |
| Bacteria_Actinobacteria_Actinobacteridae_Kitasatospora                        | 7443  |
| Bacteria_Bacteroidetes_Bacteroidia_revotella                                  | 7429  |
| Bacteria_Bacteroidetes_Flavobacteria_Flavobacterium                           | 7424  |
| Bacteria_Bacteroidetes_Flavobacteria_Cellulophaga                             | 7395  |

|                                                                     |      |
|---------------------------------------------------------------------|------|
| Bacteria_Proteobacteria_Alphaproteobacteria_Acidiphilium            | 7377 |
| Bacteria_Proteobacteria_Deltaproteobacteria_Myxococcus              | 7314 |
| Bacteria_Firmicutes_Clostridia_Ikaliphilus                          | 7295 |
| Bacteria_Plantomycetes_Plantomycetacia_Rhodopirellula               | 7271 |
| Bacteria_Firmicutes_Clostridia_esulfotomaculum                      | 7236 |
| Bacteria_Proteobacteria_Alphaproteobacteria_Nitrobacter             | 7223 |
| Bacteria_Bacteroidetes_Sphingobacteria_Chitinophaga                 | 7179 |
| Bacteria_Proteobacteria_Gammaproteobacteria_Acinetobacter           | 7166 |
| Bacteria_Actinobacteria_Actinobacteridae_Saccharopolyspora          | 7154 |
| Bacteria_Chloroflexi_Dehalococcoidetes_Dehalococcoides              | 7115 |
| Bacteria_Proteobacteria_Deltaproteobacteria_Pelobacter              | 7035 |
| Bacteria_Actinobacteria_Actinobacteridae_Propionibacterium          | 6951 |
| Bacteria_Actinobacteria_Actinobacteridae_Kribbella                  | 6940 |
| Bacteria_Actinobacteria_Actinobacteridae_Actinosynnema              | 6912 |
| Bacteria_Proteobacteria_Gammaproteobacteria_Psychrobacter           | 6889 |
| Bacteria_Deinococcus-Thermus_Deinococci_thermus                     | 6874 |
| Bacteria_Bacteroidetes_Cytophagia_pirosoma                          | 6867 |
| Bacteria_Proteobacteria_Betaproteobacteria_Achromobacter            | 6798 |
| Bacteria_Proteobacteria_Gammaproteobacteria_Hahella                 | 6752 |
| Bacteria_Proteobacteria_Deltaproteobacteria_Haliangium              | 6684 |
| Bacteria_Proteobacteria_Betaproteobacteria_hiomonas                 | 6596 |
| Bacteria_Actinobacteria_Actinobacteridae_Stackebrandtia             | 6379 |
| Bacteria_Proteobacteria_Betaproteobacteria_Variovorax               | 6272 |
| Bacteria_Actinobacteria_Actinobacteridae_Clavibacter                | 6135 |
| Bacteria_Proteobacteria_Alphaproteobacteria_Azospirillum            | 6092 |
| Bacteria_Bacteroidetes_Sphingobacteria_Salinibacter                 | 6059 |
| Bacteria_Firmicutes_Bacillales_Exiguobacterium                      | 6025 |
| Bacteria_Deinococcus-Thermus_Deinococci_eiothermus                  | 5995 |
| Bacteria_Cyanobacteria_Chroococcales_Microcystis                    | 5981 |
| Bacteria_Proteobacteria_Betaproteobacteria_Delftia                  | 5968 |
| Bacteria_Actinobacteria_Actinobacteridae_Nocardia                   | 5941 |
| Bacteria_Actinobacteria_Rubrobacteridae_Conexibacter                | 5912 |
| Bacteria_Firmicutes_Bacillales_Brevibacillus                        | 5887 |
| Bacteria_Proteobacteria_Gammaproteobacteria_Acidithiobacillus       | 5867 |
| Bacteria_Proteobacteria_Alphaproteobacteria_Gluconacetobacter       | 5840 |
| Bacteria_Proteobacteria_Gammaproteobacteria_Thioalkalivibrio        | 5820 |
| Bacteria_Bacteroidetes_Cytophagia_yadobacter                        | 5703 |
| Bacteria_Cyanobacteria_Nostocales_Anabaena                          | 5634 |
| Bacteria_Proteobacteria_Betaproteobacteria_Methylovorus             | 5616 |
| Bacteria_Actinobacteria_Actinobacteridae_Nocardiopsis               | 5497 |
| Bacteria_Proteobacteria_Epsilonproteobacteria_Arcobacter            | 5379 |
| Bacteria_Proteobacteria_Gammaproteobacteria_Buchnera                | 5328 |
| Bacteria_Proteobacteria_Gammaproteobacteria_Photobacterium          | 5328 |
| Bacteria_Proteobacteria_Alphaproteobacteria_Sphingomonas            | 5313 |
| Bacteria_Chloroflexi_Herpetosiphonales_erpetosiphon                 | 5254 |
| Bacteria_Proteobacteria_Deltaproteobacteria_Desulfatibacillum       | 5198 |
| Bacteria_Actinobacteria_Actinobacteridae_Nakamurella                | 5123 |
| Bacteria_Proteobacteria_Gammaproteobacteria_Rahnella                | 5099 |
| Bacteria_Proteobacteria_Betaproteobacteria_Methylotenera            | 5086 |
| Bacteria_Proteobacteria_Gammaproteobacteria_Pseudomonas_syringae    | 5071 |
| Bacteria_Proteobacteria_Gammaproteobacteria_Pseudomonas_syringae pv | 5045 |
| Bacteria_Proteobacteria_Alphaproteobacteria_Paracoccus              | 5019 |
| Bacteria_Proteobacteria_Gammaproteobacteria_Azotobacter             | 4990 |
| Bacteria_Proteobacteria_Alphaproteobacteria_Xanthobacter            | 4971 |
| Bacteria_Actinobacteria_Actinobacteridae_ycobacterium abscessus     | 4940 |
| Bacteria_Proteobacteria_Gammaproteobacteria_Serratia                | 4930 |
| Bacteria_Proteobacteria_Betaproteobacteria_Verminephrobacter        | 4911 |
| Bacteria_Actinobacteria_Actinobacteridae_Nocardioides               | 4888 |
| Bacteria_Actinobacteria_Actinobacteridae_Thermomonospora            | 4888 |
| Bacteria_Proteobacteria_Gammaproteobacteria_Colwellia               | 4872 |
| Bacteria_Proteobacteria_Betaproteobacteria_Nitrosomonas             | 4848 |
| Bacteria_Actinobacteria_Actinobacteridae_Geodermatophilus           | 4795 |
| Bacteria_Proteobacteria_Gammaproteobacteria_Salmonella Newport      | 4784 |
| Bacteria_Proteobacteria_Deltaproteobacteria_Desulfobacterium        | 4782 |
| Bacteria_Proteobacteria_Betaproteobacteria_Comamonas                | 4781 |
| Bacteria_Acidobacteria_Candidatus_Koribacter_Candidatus_Koribacter  | 4771 |
| Bacteria_Chlorobi_Chlorobia_Pelodictyon                             | 4760 |
| Bacteria_Proteobacteria_Alphaproteobacteria_Ochrobactrum            | 4757 |
| Bacteria_Firmicutes_Bacillales_Lysinibacillus                       | 4750 |
| Bacteria_Proteobacteria_Betaproteobacteria_Herbaspirillum           | 4732 |
| Bacteria_Plantomycetes_Plantomycetacia_Pirellula                    | 4711 |
| Bacteria_Proteobacteria_Alphaproteobacteria_Azorhizobium            | 4708 |
| Bacteria_Actinobacteria_Actinobacteridae_Kineococcus                | 4674 |
| Bacteria_Bacteroidetes_Flavobacteria_Zunongwangia                   | 4633 |
| Bacteria_Proteobacteria_Gammaproteobacteria_Salmonella dublin       | 4606 |
| Bacteria_Verrucomicrobia_Opitutae_pitutus                           | 4588 |
| Bacteria_Actinobacteria_Actinobacteridae_Gordonia                   | 4548 |
| Bacteria_Proteobacteria_Alphaproteobacteria_Chelativorans           | 4530 |
| Bacteria_Proteobacteria_Alphaproteobacteria_Magnetospirillum        | 4514 |
| Bacteria_Proteobacteria_Betaproteobacteria_Alicyclophilus           | 4484 |
| Bacteria_Proteobacteria_Betaproteobacteria_Aromatoleum              | 4483 |
| Bacteria_Proteobacteria_Betaproteobacteria_andidatus Accumulibacter | 4438 |
| Bacteria_Proteobacteria_Alphaproteobacteria_Starkeya                | 4424 |
| Bacteria_Cyanobacteria_Gloeobacteria_Gloeobacter                    | 4406 |
| Bacteria_Proteobacteria_Betaproteobacteria_Albidiferax              | 4401 |
| Bacteria_Proteobacteria_Betaproteobacteria_Chromobacterium          | 4397 |
| Bacteria_Proteobacteria_Betaproteobacteria_ethylbium                | 4359 |
| Bacteria_Proteobacteria_Alphaproteobacteria_Polymorphum             | 4354 |
| Bacteria_Proteobacteria_Gammaproteobacteria_Aggregatibacter         | 4353 |
| Bacteria_Proteobacteria_Alphaproteobacteria_Sphingobium             | 4347 |
| Bacteria_Proteobacteria_Betaproteobacteria_eptothrix                | 4343 |
| Bacteria_Cyanobacteria_Oscillatoriales_Trichodesmium                | 4342 |
| Bacteria_Firmicutes_Clostridia_alanaerobium                         | 4305 |
| Bacteria_Chlorobi_Chlorobia_hlorobaculum                            | 4294 |
| Bacteria_Proteobacteria_Alphaproteobacteria_Jannaschia              | 4271 |
| Bacteria_Proteobacteria_Gammaproteobacteria_Teredinibacter          | 4249 |

|                                                                    |      |
|--------------------------------------------------------------------|------|
| Bacteria_Proteobacteria_Epsilonproteobacteria_Sulfurimonas         | 4239 |
| Bacteria_Proteobacteria_Gammaproteobacteria_Enterobacter           | 4236 |
| Bacteria_Actinobacteria_Actinobacteridae_Rothia                    | 4203 |
| Bacteria_Proteobacteria_Gammaproteobacteria_Salmonella enteritidis | 4198 |
| Bacteria_Actinobacteria_Actinobacteridae_Beutenbergia              | 4195 |
| Bacteria_Acidobacteria_Acidobacteriales_erriglobus                 | 4177 |
| Bacteria_Actinobacteria_Actinobacteridae_Tsakumurella              | 4170 |
| Bacteria_Proteobacteria_Alphaproteobacteria_Wolbachia              | 4159 |
| Bacteria_Proteobacteria_Betaproteobacteria_Dechloromonas           | 4155 |
| Bacteria_Firmicutes_Clostridia_ellulosilyticum                     | 4150 |
| Bacteria_Proteobacteria_Alphaproteobacteria_Roseobacter            | 4118 |
| Bacteria_Proteobacteria_Alphaproteobacteria_Ehrlichia              | 4091 |
| Bacteria_Proteobacteria_Alphaproteobacteria_Dinoroseobacter        | 4086 |
| Bacteria_Fusobacteria_Fusobacterales_Sealdella                     | 4058 |
| Bacteria_Bacteroidetes_Flavobacteria_Fluviicola                    | 4016 |
| Bacteria_Proteobacteria_Deltaproteobacteria_Syntrophobacter        | 4012 |
| Bacteria_Proteobacteria_Gammaproteobacteria_Saccharophagus         | 3999 |
| Bacteria_Proteobacteria_Betaproteobacteria_Azoarcus                | 3981 |
| Bacteria_Proteobacteria_Gammaproteobacteria_Salmonella gallinarum  | 3953 |
| Bacteria_Bacteroidetes_Flavobacteria_Riemerella                    | 3946 |
| Bacteria_Gemmatimonadetes_Gemmatimonadales_emmatimonas             | 3932 |
| Bacteria_Proteobacteria_Betaproteobacteria_Thauera                 | 3927 |
| Bacteria_Proteobacteria_Alphaproteobacteria_Novosphingobium        | 3917 |
| Bacteria_Spirochaetes_Spirochaetales_Borrelia                      | 3901 |
| Bacteria_Bacteroidetes_Bacteroidia_Porphyrimonas                   | 3885 |
| Bacteria_Proteobacteria_Alphaproteobacteria_Oligotropha            | 3846 |
| Bacteria_Proteobacteria_Alphaproteobacteria_Phenylobacterium       | 3838 |
| Bacteria_Bacteroidetes_Bacteroidia_Parabacteroides                 | 3831 |
| Bacteria_Actinobacteria_Actinobacteridae_Saccharomonospora         | 3828 |
| Bacteria_Proteobacteria_Alphaproteobacteria_Methylocella           | 3816 |
| Bacteria_Firmicutes_Bacillales_Solibacillus                        | 3799 |
| Bacteria_Firmicutes_Clostridia_utrivibrio                          | 3799 |
| Bacteria_Fibrobacteres_Fibrobacterales_ibrobacter                  | 3797 |
| Bacteria_Thermotogae_Thermotogales_Thermosipho                     | 3795 |
| Bacteria_Proteobacteria_Gammaproteobacteria_Ferrimonas             | 3781 |
| Bacteria_Firmicutes_Clostridia_uminococcus                         | 3775 |
| Bacteria_Proteobacteria_Alphaproteobacteria_Beijerinckia           | 3774 |
| Bacteria_Bacteroidetes_Cytophagia_ytophaga                         | 3771 |
| Bacteria_Proteobacteria_Gammaproteobacteria_Histophilus            | 3764 |
| Bacteria_Bacteroidetes_Cytophagia_arivirga                         | 3748 |
| Bacteria_Planctomycetes_Planctomycetacia_Isosphaera                | 3721 |
| Bacteria_Proteobacteria_Alphaproteobacteria_typhus group           | 3714 |
| Bacteria_Proteobacteria_Gammaproteobacteria_Cellvibrio             | 3711 |
| Bacteria_Actinobacteria_Actinobacteridae_Sanguibacter              | 3710 |
| Bacteria_Proteobacteria_Betaproteobacteria_Janthinobacterium       | 3695 |
| Bacteria_Actinobacteria_Actinobacteridae_Cellulomonas              | 3673 |
| Bacteria_Actinobacteria_Actinobacteridae_Microbacterium            | 3671 |
| Bacteria_Proteobacteria_Alphaproteobacteria_Zymomonas              | 3663 |
| Bacteria_Proteobacteria_Gammaproteobacteria_Proteus                | 3661 |
| Bacteria_Dictyoglomi_Dictyoglomales_Dictyoglossus                  | 3656 |
| Bacteria_Cyanobacteria_Nostocales_Trichormus                       | 3646 |
| Bacteria_Proteobacteria_Magnetococcus_Magnetococcus                | 3594 |
| Bacteria_Proteobacteria_Deltaproteobacteria_Bdellovibrio           | 3583 |
| Bacteria_Proteobacteria_Betaproteobacteria_Polynucleobacter        | 3581 |
| Bacteria_Proteobacteria_Alphaproteobacteria_Parvibaculum           | 3580 |
| Bacteria_Bacteroidetes_Flavobacteria_Gramella                      | 3554 |
| Bacteria_Actinobacteria_Actinobacteridae_Intrasporangium           | 3551 |
| Bacteria_Actinobacteria_Actinobacteridae_Thermobispora             | 3545 |
| Bacteria_Proteobacteria_Gammaproteobacteria_Psychromonas           | 3530 |
| Bacteria_Proteobacteria_Alphaproteobacteria_Rhodomicrobium         | 3513 |
| Bacteria_Cyanobacteria_Chroococcales_Synechocystis                 | 3507 |
| Bacteria_Proteobacteria_Alphaproteobacteria_Hyphomonas             | 3499 |
| Bacteria_Firmicutes_Bacillales_Oceanobacillus                      | 3490 |
| Bacteria_Chloroflexi_Sphaerobacteridae_Sphaerobacter               | 3471 |
| Bacteria_Proteobacteria_Gammaproteobacteria_Halomonas              | 3471 |
| Bacteria_Proteobacteria_Alphaproteobacteria_Hyphomicrobium         | 3452 |
| Bacteria_Bacteroidetes_Cytophagia_eadbetterella                    | 3429 |
| Bacteria_Actinobacteria_Actinobacteridae_Renibacterium             | 3421 |
| Bacteria_Proteobacteria_Deltaproteobacteria_Desulfomicrobium       | 3421 |
| Bacteria_Aquificae_Aquificales_ulfurihydrogenibium                 | 3420 |
| Bacteria_Bacteroidetes_Flavobacteria_Maribacter                    | 3411 |
| Bacteria_Actinobacteria_Actinobacteridae_Xylanimonas               | 3335 |
| Bacteria_Proteobacteria_Alphaproteobacteria_Brevundimonas          | 3326 |
| Bacteria_Firmicutes_Clostridia_Symbiobacterium                     | 3313 |
| Bacteria_Proteobacteria_Gammaproteobacteria_Chromohalobacter       | 3298 |
| Bacteria_Proteobacteria_Betaproteobacteria_Herminiimonas           | 3274 |
| Bacteria_Proteobacteria_Deltaproteobacteria_Desulfarculus          | 3268 |
| Bacteria_Proteobacteria_Deltaproteobacteria_Desulfococcus          | 3255 |
| Bacteria_Proteobacteria_Deltaproteobacteria_Desulfotalea           | 3233 |
| Bacteria_Proteobacteria_Deltaproteobacteria_Bacteriovorax          | 3229 |
| Bacteria_Bacteroidetes_Flavobacteria_Robiginitalea                 | 3211 |
| Bacteria_Proteobacteria_Gammaproteobacteria_Allochromatium         | 3211 |
| Bacteria_Proteobacteria_Alphaproteobacteria_Ketogulonicigenium     | 3209 |
| Bacteria_Proteobacteria_Betaproteobacteria_Laribacter              | 3208 |
| Bacteria_Proteobacteria_Alphaproteobacteria_Hirschia               | 3187 |
| Bacteria_Proteobacteria_Alphaproteobacteria_Sphingopyxis           | 3184 |
| Bacteria_Proteobacteria_Deltaproteobacteria_Syntrophus             | 3145 |
| Bacteria_Firmicutes_Bacillales_Alicyclobacillaceae                 | 3135 |
| Bacteria_Actinobacteria_Rubrobacteridae_Rubrobacter                | 3127 |
| Bacteria_Proteobacteria_Gammaproteobacteria_Tolomonas              | 3126 |
| Bacteria_Chloroflexi_Anaerolineae_naerolinea                       | 3110 |
| Bacteria_Verrucomicrobia_Opisthokonta_Coraliomargarita             | 3110 |
| Bacteria_Firmicutes_Clostridia_yntrophobotulus                     | 3105 |
| Bacteria_Actinobacteria_Actinobacteridae_Thermobifida              | 3085 |
| Bacteria_Proteobacteria_Gammaproteobacteria_Pseudoxanthomonas      | 3068 |
| Bacteria_Actinobacteria_Actinobacteridae_Brachiobacterium          | 3062 |

|                                                                         |      |
|-------------------------------------------------------------------------|------|
| Bacteria_Proteobacteria_Alphaproteobacteria_Maricaulis                  | 3060 |
| Bacteria_Firmicutes_Bacillales_licyclobacillus                          | 3059 |
| Bacteria_Actinobacteria_Coriobacteridae_Eggerthella                     | 3054 |
| Bacteria_Bacteroidetes_Bacteroidia_Paludibacter                         | 3020 |
| Bacteria_Actinobacteria_Actinobacteridae_Segniliiparus                  | 3001 |
| Bacteria_Proteobacteria_Alphaproteobacteria_Erythrobacter               | 2999 |
| Bacteria_Proteobacteria_Betaproteobacteria_Sideroxydans                 | 2977 |
| Bacteria_Proteobacteria_Gammaproteobacteria_Methylococcus               | 2925 |
| Bacteria_Deinococcus-Thermus_Deinococci_Truepera                        | 2924 |
| Bacteria_Firmicutes_Clostridia_eliobacterium                            | 2923 |
| Bacteria_Firmicutes_Clostridia_hermincola                               | 2908 |
| Bacteria_Proteobacteria_Alphaproteobacteria_Acetobacter                 | 2906 |
| Bacteria_Deferribacteres_Deferribacterales_entrovibrio                  | 2901 |
| Bacteria_Firmicutes_Clostridia_elotomaculum                             | 2884 |
| Bacteria_Proteobacteria_Gammaproteobacteria_Alkalilimnicola             | 2862 |
| Bacteria_Bacteroidetes_Sphingobacteria_Rhodothermus                     | 2861 |
| Bacteria_Proteobacteria_Deltaproteobacteria_Desulfobacca                | 2860 |
| Bacteria_Fusobacteria_Fusobacterales_Ilyobacter                         | 2859 |
| Bacteria_Chloroflexi_Thermomicrobiales_hermomicrobium                   | 2858 |
| Bacteria_Proteobacteria_Betaproteobacteria_Gallionella                  | 2853 |
| Bacteria_Firmicutes_Clostridia_atranaerobius                            | 2847 |
| Bacteria_Proteobacteria_Alphaproteobacteria_Rickettsia                  | 2843 |
| Bacteria_Thermobaculum_C Bacteria_Thermobaculum                         | 2827 |
| Bacteria_Proteobacteria_Betaproteobacteria_Thiobacillus                 | 2826 |
| Bacteria_Firmicutes_Bacillales_Anoxybacillus                            | 2819 |
| Bacteria_Proteobacteria_Alphaproteobacteria_Anaplasma                   | 2803 |
| Bacteria_Proteobacteria_Epsilonproteobacteria_Sulfuricurvum             | 2794 |
| Bacteria_Proteobacteria_Gammaproteobacteria_Alcanivorax                 | 2752 |
| Bacteria_Actinobacteria_Coriobacteridae_Slackia                         | 2750 |
| Bacteria_Proteobacteria_Betaproteobacteria_Nitrosospira                 | 2732 |
| Bacteria_Chlorobi_Chlorobia_hlorherpeton                                | 2708 |
| Bacteria_Bacteroidetes_Flavobacteria_Croceibacter                       | 2702 |
| Bacteria_Proteobacteria_Alphaproteobacteria_Parvularcula                | 2687 |
| Bacteria_Firmicutes_Clostridia_thanoligenens                            | 2663 |
| Bacteria_Proteobacteria_Gammaproteobacteria_Kangiella                   | 2630 |
| Bacteria_Proteobacteria_Alphaproteobacteria_Gluconobacter               | 2626 |
| Bacteria_Actinobacteria_Actinobacteridae_Gardnerella                    | 2622 |
| Bacteria_Firmicutes_Clostridia_Carboxydotherrmus                        | 2615 |
| Bacteria_Proteobacteria_Alphaproteobacteria_Orientia                    | 2614 |
| Bacteria_Proteobacteria_Betaproteobacteria_Methylobacillus              | 2609 |
| Bacteria_Proteobacteria_Gammaproteobacteria_Idiomarina                  | 2608 |
| Bacteria_Proteobacteria_Deltaproteobacteria_Desulfurivibrio             | 2595 |
| Bacteria_Firmicutes_Clostridia_hermonoerobacterium                      | 2583 |
| Bacteria_Chrysiogenetes_Chrysiogenales_esulfurispirillum                | 2551 |
| Bacteria_Firmicutes_Clostridia_Caldanaerobacter                         | 2545 |
| Bacteria_Proteobacteria_Alphaproteobacteria_andidatus_Puniceispirillum  | 2545 |
| Bacteria_Bacteroidetes_Flavobacteria_lavobacteriaceae                   | 2533 |
| Bacteria_Actinobacteria_Actinobacteridae_Kytococcus                     | 2531 |
| Bacteria_Actinobacteria_Actinobacteridae_Jonesia                        | 2495 |
| Bacteria_Proteobacteria_Gammaproteobacteria_Sodalis                     | 2490 |
| Bacteria_Firmicutes_Clostridia_yntrophomonas                            | 2473 |
| Bacteria_Verrucomicrobia_unclassified_Verrucomicrobia_Methylacidiphilum | 2470 |
| Bacteria_Proteobacteria_Deltaproteobacteria_Desulfohalobium             | 2455 |
| Bacteria_Cyanobacteria_Chroococcales_Thermosynechococcus                | 2451 |
| Bacteria_Firmicutes_Clostridia_Moorella                                 | 2451 |
| Bacteria_Proteobacteria_Epsilonproteobacteria_Sulfurovum                | 2433 |
| Bacteria_Proteobacteria_Alphaproteobacteria_Granulibacter               | 2430 |
| Bacteria_Proteobacteria_Gammaproteobacteria_Halorhodospira              | 2406 |
| Bacteria_Deinococcus-Thermus_Deinococci_ceanithermus                    | 2372 |
| Bacteria_Proteobacteria_Gammaproteobacteria_Basfia                      | 2367 |
| Bacteria_Proteobacteria_Gammaproteobacteria_Halothiobacillus            | 2353 |
| Bacteria_Actinobacteria_Actinobacteridae_Kocuria                        | 2352 |
| Bacteria_Deferribacteres_Deferribacterales_eferribacter                 | 2338 |
| Bacteria_Firmicutes_Clostridia_alothermothrix                           | 2324 |
| Bacteria_Firmicutes_Clostridia_Thermaerobacter                          | 2324 |
| Bacteria_Chlorobi_Chlorobia_rostheochloris                              | 2319 |
| Bacteria_Firmicutes_Clostridia_yntrophothermus                          | 2311 |
| Bacteria_Firmicutes_Clostridia_cetohalobium                             | 2276 |
| Bacteria_Proteobacteria_Alphaproteobacteria_Candidatus_Liberibacter     | 2266 |
| Bacteria_Proteobacteria_Epsilonproteobacteria_Sulfurospirillum          | 2243 |
| Bacteria_Fusobacteria_Fusobacterales_eptotrichia                        | 2218 |
| Bacteria_Actinobacteria_Actinobacteridae_Micrococcus                    | 2207 |
| Bacteria_Deinococcus-Thermus_Deinococci_arinithermus                    | 2194 |
| Bacteria_Proteobacteria_Gammaproteobacteria_Thiomicrospira              | 2187 |
| Bacteria_Bacteroidetes_Flavobacteria_Capnocytophaga                     | 2171 |
| Bacteria_Actinobacteria_Actinobacteridae_Acidothermus                   | 2157 |
| Bacteria_Firmicutes_Clostridia_hermosediminibacter                      | 2151 |
| Bacteria_Verrucomicrobia_Verrucomicrobiae_Akkermansia                   | 2137 |
| Bacteria_Firmicutes_Clostridia_andidatus_Desulfurudis                   | 2136 |
| Bacteria_Deferribacteres_Deferribacterales_Deferribacteraceae           | 2089 |
| Bacteria_Thermotogae_Thermotogales_Kosmotoga                            | 2087 |
| Bacteria_Proteobacteria_Epsilonproteobacteria_Nitratifactor             | 2076 |
| Bacteria_Firmicutes_Bacillales_Macrococcus                              | 2059 |
| Bacteria_Firmicutes_Clostridia_Ammonifex                                | 2049 |
| Bacteria_Aquificae_Aquificales_Persephonella                            | 2048 |
| Bacteria_Fusobacteria_Fusobacterales_usobacterium                       | 2046 |
| Bacteria_Bacteroidetes_Flavobacteria_Weeksella                          | 2045 |
| Bacteria_Proteobacteria_Gammaproteobacteria_andidatus_Hamiltonella      | 2045 |
| Bacteria_Aquificae_Aquificales_Hydrogenobacter                          | 2041 |
| Bacteria_Proteobacteria_Epsilonproteobacteria_Wolinella                 | 2028 |
| Bacteria_Chlamydiae_Chlamydiales_andidatus_Protochlamydia               | 2023 |
| Bacteria_Firmicutes_Negativicutes_Acidaminococcus                       | 2016 |
| Bacteria_Proteobacteria_Gammaproteobacteria_Pasteurella                 | 2015 |
| Bacteria_Actinobacteria_Actinobacteridae_Leifsonia                      | 2001 |
| Bacteria_Nitrospirae_Nitrospirales_hermodesulfovibrio                   | 1982 |
| Bacteria_Actinobacteria_Acidimicrobiales_Acidimicrobium                 | 1935 |

|                    |                                                                               |       |
|--------------------|-------------------------------------------------------------------------------|-------|
|                    | Bacteria_Chlamydiae_Chlamydiales_Waddlia                                      | 1919  |
|                    | Bacteria_Proteobacteria_Gammaproteobacteria_ulfur-oxidizing symbionts         | 1912  |
|                    | Bacteria_Actinobacteria_Actinobacteridae_obiluncus                            | 1904  |
|                    | Bacteria_Thermotogae_Thermotogales_Petrogoga                                  | 1890  |
|                    | Bacteria_Proteobacteria_Gammaproteobacteria_Moraxella                         | 1878  |
|                    | Bacteria_Synergistetes_Synergistia_minobacterium                              | 1872  |
|                    | Bacteria_Tenericutes_Mollicutes_Ureaplasma                                    | 1866  |
|                    | Bacteria_Firmicutes_Negativicutes_eillonella                                  | 1843  |
|                    | Bacteria_Proteobacteria_Epsilonproteobacteria_Nitratiruptor                   | 1843  |
|                    | Bacteria_Proteobacteria_Alphaproteobacteria_Neorickettsia                     | 1830  |
|                    | Bacteria_candidate division WWE_Candidatus Cloacamonas_Candidatus Cloacamonas | 1813  |
|                    | Bacteria_Firmicutes_Clostridia_Finegoldia                                     | 1813  |
|                    | Bacteria_Aquificae_Aquificales_Thermovibrio                                   | 1812  |
|                    | Bacteria_Firmicutes_Clostridia_Anaerococcus                                   | 1795  |
|                    | Bacteria_Proteobacteria_Gammaproteobacteria_Candidatus Blochmannia            | 1780  |
|                    | Bacteria_Actinobacteria_Coriobacteridae_Coriobacterium                        | 1768  |
|                    | Bacteria_Firmicutes_Lactobacillales_Pediococcus                               | 1755  |
|                    | Bacteria_Actinobacteria_Coriobacteridae_Olsenella                             | 1739  |
|                    | Bacteria_Synergistetes_Synergistia_hermanaerovibrio                           | 1737  |
|                    | Bacteria_Proteobacteria_Epsilonproteobacteria_Nautillia                       | 1730  |
|                    | Bacteria_Thermotogae_Thermotogales_ervidobacterium                            | 1725  |
|                    | Bacteria_Actinobacteria_Actinobacteridae_Arcanobacterium                      | 1717  |
|                    | Bacteria_Firmicutes_Lactobacillales_Aerococcus                                | 1684  |
|                    | Bacteria_Firmicutes_Lactobacillales_Oenococcus                                | 1682  |
|                    | Bacteria_Proteobacteria_Deltaproteobacteria_Hippea                            | 1653  |
|                    | Bacteria_Aquificae_Aquificales_Hydrogenobaculum                               | 1626  |
|                    | Bacteria_Chloroflexi_Dehalococcoidetes_Dehalogenimonas                        | 1619  |
|                    | Bacteria_Firmicutes_Clostridia_Filifactor                                     | 1615  |
|                    | Bacteria_Aquificae_Aquificales_Thermocrinis                                   | 1592  |
|                    | Bacteria_Actinobacteria_Actinobacteridae_Tropheryma                           | 1586  |
|                    | Bacteria_Firmicutes_Clostridia_Clostridiales                                  | 1566  |
|                    | Bacteria_Proteobacteria_Betaproteobacteria_Taylorella                         | 1556  |
|                    | Bacteria_Aquificae_Aquificales_Aquifex                                        | 1552  |
|                    | Bacteria_Elusimicrobia_Elusimicrobia (class)_Elusimicrobium                   | 1528  |
|                    | Bacteria_Aquificae_Aquificales_esulfurobacterium                              | 1496  |
|                    | Bacteria_Firmicutes_Clostridia_Coprothermobacter                              | 1481  |
|                    | Bacteria_Fusobacteria_Fusobacteriales_treptobacillus                          | 1423  |
|                    | Bacteria_Tenericutes_Mollicutes_andidatus Phytoplasma asteris                 | 1420  |
|                    | Bacteria_Tenericutes_Mollicutes_Acholeplasma                                  | 1380  |
|                    | Bacteria_Actinobacteria_Coriobacteridae_Cryptobacterium                       | 1355  |
|                    | Bacteria_Proteobacteria_Alphaproteobacteria_Candidatus Pelagibacter           | 1354  |
|                    | Bacteria_Actinobacteria_Coriobacteridae_Atopobium                             | 1353  |
|                    | Bacteria_Proteobacteria_Deltaproteobacteria_Lawsonia                          | 1342  |
|                    | Bacteria_Proteobacteria_Alphaproteobacteria_phagocytophilum group             | 1330  |
|                    | Bacteria_Proteobacteria_Gammaproteobacteria_Dichelobacter                     | 1273  |
|                    | Bacteria_Bacteroidetes_Candidatus Amoebophilus_Candidatus Amoebophilus        | 1253  |
|                    | Bacteria_Cyanobacteria_Chroococcales_Chroococcales                            | 1198  |
|                    | Bacteria_Bacteroidetes_Flavobacteria_Blattabacterium                          | 1168  |
|                    | Bacteria_Bacteroidetes_Flavobacteria_andidatus Sulcia                         | 941   |
|                    | Bacteria_Bacteroidetes_Bacteroidia_andidatus Azobacteroides                   | 847   |
|                    | Bacteria_Elusimicrobia_environmental samples_environmental samples            | 767   |
|                    | Bacteria_Tenericutes_Mollicutes_Mesoplasma                                    | 683   |
|                    | Bacteria_Tenericutes_Mollicutes_16SrXII (Stolbur group)                       | 633   |
|                    | Bacteria_Proteobacteria_Gammaproteobacteria_Wigglesworthia                    | 612   |
|                    | Bacteria_Proteobacteria_Gammaproteobacteria_Candidatus Baumannia              | 595   |
|                    | Bacteria_Proteobacteria_Gammaproteobacteria_Candidatus Riesia                 | 540   |
|                    | Bacteria_Tenericutes_Mollicutes_6SrX (Apple proliferation group)              | 447   |
|                    | Bacteria_Proteobacteria_Gammaproteobacteria_Alteromonas                       | 256   |
|                    | Bacteria_Proteobacteria_Betaproteobacteria_Candidatus Zinderia                | 206   |
|                    | Bacteria_Proteobacteria_Gammaproteobacteria_Candidatus Carsonella             | 182   |
|                    | Bacteria_Proteobacteria_Alphaproteobacteria_andidatus Hodgkinia               | 169   |
| Eukaryota          | Eukaryota_Fungi_Dikarya_Aspergillus                                           | 59135 |
| 1,901,810 proteins | Eukaryota_Fungi_Dikarya_Saccharomyces                                         | 57409 |
| 110 species        | Eukaryota_Fungi_Dikarya_Ajellomyces                                           | 56581 |
|                    | Eukaryota_Metazoa_Chordata_Homo                                               | 56392 |
|                    | Eukaryota_Parabasalia_Trichomonadida_Trichomonas                              | 50189 |
|                    | Eukaryota_Metazoa_Chordata_Mus                                                | 48070 |
|                    | Eukaryota_Metazoa_Nematoda_Caenorhabditis                                     | 44983 |
|                    | Eukaryota_Metazoa_Chordata_Callithrix                                         | 41805 |
|                    | Eukaryota_Alveolata_Ciliophora_Paramecium                                     | 39416 |
|                    | Eukaryota_Metazoa_Chordata_Danio                                              | 38386 |
|                    | Eukaryota_Metazoa_Chordata_Macaca                                             | 35993 |
|                    | Eukaryota_Viridiplantae_Streptophyta_hyscomitrella                            | 34835 |
|                    | Eukaryota_Metazoa_Chordata_Rattus                                             | 34098 |
|                    | Eukaryota_Alveolata_Apicomplexa_Plasmodium (Vinckeia)                         | 34026 |
|                    | Eukaryota_Metazoa_Arthropoda_Sophophora                                       | 33527 |
|                    | Eukaryota_Viridiplantae_Streptophyta_Arabidopsis                              | 32650 |
|                    | Eukaryota_Metazoa_Chordata_Monodelphis                                        | 31314 |
|                    | Eukaryota_Fungi_Dikarya_Neosartorya                                           | 29944 |
|                    | Eukaryota_Metazoa_Chordata_ranchiostoma                                       | 28545 |
|                    | Eukaryota_Metazoa_Chordata_Tetraodon                                          | 27823 |
|                    | Eukaryota_Metazoa_Chordata_Silurana                                           | 27175 |
|                    | Eukaryota_Metazoa_Chordata_Ornithorhynchus                                    | 26759 |
|                    | Eukaryota_Metazoa_Chordata_Bos                                                | 26158 |
|                    | Eukaryota_Fungi_Dikarya_Paracoccidioides                                      | 25734 |
|                    | Eukaryota_Fungi_Dikarya_Arthroderma                                           | 25649 |
|                    | Eukaryota_Metazoa_Chordata_anis                                               | 25441 |
|                    | Eukaryota_Metazoa_Cnidaria_Nematostella                                       | 24435 |
|                    | Eukaryota_Fungi_Dikarya_Pyrenophora                                           | 23767 |
|                    | Eukaryota_Metazoa_Chordata_Equus                                              | 23099 |
|                    | Eukaryota_Metazoa_Chordata_Gallus                                             | 21609 |
|                    | Eukaryota_Metazoa_Arthropoda_Anopheles                                        | 20535 |
|                    | Eukaryota_Fungi_Dikarya_Puccinia                                              | 20437 |
|                    | Eukaryota_Fungi_Dikarya_Metarhizium                                           | 20410 |
|                    | Eukaryota_Metazoa_Arthropoda_Ixodes                                           | 20381 |

|                                                                                  |       |
|----------------------------------------------------------------------------------|-------|
| Eukaryota_Metazoa_Chordata_Ciona                                                 | 20151 |
| Eukaryota_Metazoa_Chordata_us                                                    | 19634 |
| Eukaryota_Fungi_Dikarya_ilobasidiella or Cryptococcus neoformans species complex | 19564 |
| Eukaryota_Euglenozoa_Kinetoplastida_chizotrypanum                                | 19238 |
| Eukaryota_Alveolata_Apicomplexa_Toxoplasma                                       | 18633 |
| Eukaryota_Fungi_Dikarya_accaria                                                  | 17895 |
| Eukaryota_Fungi_Dikarya_andida                                                   | 17781 |
| Eukaryota_stramenopiles_Oomycetes_Phytophthora                                   | 17602 |
| Eukaryota_Fungi_Dikarya_Coccidioides                                             | 17438 |
| Eukaryota_Fungi_Dikarya_Botryotinia                                              | 16365 |
| Eukaryota_Euglenozoa_Kinetoplastida_Leishmania                                   | 16094 |
| Eukaryota_Metazoa_Arthropoda_Stegomyia                                           | 16047 |
| Eukaryota_Fungi_Dikarya_Phaeosphaeria                                            | 15996 |
| Eukaryota_Fungi_Dikarya_ectria haematococca complex                              | 15679 |
| Eukaryota_Viridiplantae_Chlorophyta_streococcus                                  | 15372 |
| Eukaryota_Fungi_Dikarya_Sclerotinia                                              | 14400 |
| Eukaryota_Fungi_Dikarya_Moniliophthora                                           | 13649 |
| Eukaryota_Fungi_Dikarya_oprinopsis                                               | 13335 |
| Eukaryota_Fungi_Dikarya_chizophyllum                                             | 13128 |
| Eukaryota_Fungi_Dikarya_Talaromyces                                              | 12996 |
| Eukaryota_Fungi_Dikarya_enicillium chrysogenum complex                           | 12773 |
| Eukaryota_Amoebozoa_Mycetozoa_Dictyostelium                                      | 12760 |
| Eukaryota_Fungi_Dikarya_agnaporthe                                               | 12686 |
| Eukaryota_Fungi_Dikarya_Leptosphaeria maculans complex                           | 12468 |
| Eukaryota_stramenopiles_PX clade_Ectocarpus                                      | 12364 |
| Eukaryota_Amoebozoa_Mycetozoa_Polysphondylium                                    | 12350 |
| Eukaryota_Fungi_Dikarya_lomerella                                                | 12019 |
| Eukaryota_stramenopiles_Bacillariophyta_halassiosira                             | 11625 |
| Eukaryota_Diplomonadida_Hexamitidae_Giardia                                      | 11620 |
| Eukaryota_Fungi_Dikarya_haetomium                                                | 11041 |
| Eukaryota_Fungi_Dikarya_ordaria                                                  | 10819 |
| Eukaryota_Metazoa_Arthropoda_ediculus                                            | 10763 |
| Eukaryota_Fungi_Dikarya_odospora                                                 | 10526 |
| Eukaryota_Alveolata_Apicomplexa_Plasmodium (Plasmodium)                          | 10479 |
| Eukaryota_Fungi_Dikarya_Penicillium                                              | 10447 |
| Eukaryota_Fungi_Dikarya_Verticillium                                             | 10233 |
| Eukaryota_stramenopiles_Bacillariophyta_Phaeodactylum                            | 10108 |
| Eukaryota_Fungi_Dikarya_eurospora                                                | 9827  |
| Eukaryota_Fungi_Dikarya_Schizosaccharomyces                                      | 9767  |
| Eukaryota_Euglenozoa_Kinetoplastida_Trypanosoma                                  | 9688  |
| Eukaryota_Fungi_Dikarya_Emericella                                               | 9542  |
| Eukaryota_Fungi_Dikarya_Pichia                                                   | 9243  |
| Eukaryota_Choanoflagellida_Codonosigidae_Monosiga                                | 9188  |
| Eukaryota_Fungi_Dikarya_Postia                                                   | 8983  |
| Eukaryota_Fungi_Dikarya_rosmannia                                                | 8311  |
| Eukaryota_Euglenozoa_Kinetoplastida_eishmania braziliensis species complex       | 8102  |
| Eukaryota_Fungi_Dikarya_Trichophyton                                             | 8028  |
| Eukaryota_Amoebozoa_Archamoebae_Entamoeba                                        | 7948  |
| Eukaryota_Alveolata_Apicomplexa_Theileria                                        | 7862  |
| Eukaryota_Fungi_Dikarya_Uncinocarpus                                             | 7760  |
| Eukaryota_Fungi_Dikarya_Tuber                                                    | 7494  |
| Eukaryota_Fungi_Dikarya_Sporisorium                                              | 6673  |
| Eukaryota_Fungi_Dikarya_Ustilago                                                 | 6548  |
| Eukaryota_Fungi_Dikarya_Yarrowia                                                 | 6414  |
| Eukaryota_Fungi_Dikarya_Debaryomyces                                             | 6242  |
| Eukaryota_Fungi_Dikarya_Clavispora                                               | 5932  |
| Eukaryota_Fungi_Dikarya_Meyerozyma                                               | 5919  |
| Eukaryota_Fungi_Dikarya_cheffersomyces                                           | 5796  |
| Eukaryota_Fungi_Dikarya_Lodderomyces                                             | 5779  |
| Eukaryota_Fungi_Dikarya_anderwaltozyma                                           | 5353  |
| Eukaryota_Alveolata_Apicomplexa_Plasmodium (Laverania)                           | 5349  |
| Eukaryota_Fungi_Dikarya_itosporic Nakaseomyces                                   | 5197  |
| Eukaryota_Fungi_Dikarya_Lachancea                                                | 5093  |
| Eukaryota_Fungi_Dikarya_Kluyveromyces                                            | 5074  |
| Eukaryota_Fungi_Dikarya_ygosaccharomyces                                         | 4987  |
| Eukaryota_Fungi_Dikarya_Eremothecium                                             | 4761  |
| Eukaryota_Fungi_Dikarya_Malassezia                                               | 4274  |
| Eukaryota_Alveolata_Apicomplexa_Cryptosporidium                                  | 3886  |
| Eukaryota_Fungi_Microsporidia_Encephalitozoon                                    | 3738  |
| Eukaryota_Alveolata_Apicomplexa_Babesia                                          | 3686  |
| Eukaryota_Fungi_Microsporidia_Enterocytozoon                                     | 3311  |
| Eukaryota_Fungi_Microsporidia_Nosema                                             | 2060  |
| Eukaryota_Cryptophyta_Pyrenomonadales_Guillardia                                 | 598   |
| Eukaryota_Cryptophyta_Cryptomonadales_Hemiselmis                                 | 498   |
| Eukaryota_Metazoa_Arthropoda_Culex                                               | 92    |
| <i>Eukaryota_Viridiplantae_Streptophyta_Welwitschia</i>                          | 19    |
| Viruses                                                                          | 909   |
| 19,841 proteins                                                                  | 811   |
| 325 species                                                                      | 786   |
| Viruses_dsDNA viruses, no RNA stage_Mimiviridae_Mimivirus                        | 685   |
| Viruses_dsDNA viruses, no RNA stage_Poxviridae_rthopoxvirus                      | 556   |
| Viruses_dsDNA viruses, no RNA stage_Asfarviridae_Asfivirus                       | 543   |
| Viruses_dsDNA viruses, no RNA stage_Phycodnaviridae_Chlorovirus                  | 543   |
| Viruses_dsDNA viruses, no RNA stage_Herpesvirales_Cytomegalovirus                | 541   |
| Viruses_dsDNA viruses, no RNA stage_Poxviridae_Vaccinia virus                    | 531   |
| Viruses_ssRNA negative-strand viruses_Orthomyxoviridae_influenzavirus A          | 472   |
| Viruses_dsDNA viruses, no RNA stage_Herpesvirales_Varicellovirus                 | 469   |
| Viruses_dsDNA viruses, no RNA stage_Nimaviridae_Whispovirus                      | 462   |
| Viruses_dsDNA viruses, no RNA stage_Phycodnaviridae_occolithovirus               | 457   |
| Viruses_dsDNA viruses, no RNA stage_Iridoviridae_Iridovirus                      | 355   |
| Viruses_dsDNA viruses, no RNA stage_Ascoviridae_Ascovirus                        | 344   |
| Viruses_dsDNA viruses, no RNA stage_Baculoviridae_Alphabaculovirus               | 324   |
| Viruses_dsDNA viruses, no RNA stage_Caudovirales_4-like viruses                  | 306   |
| Viruses_Retro-transcribing viruses_Retroviridae_Primate lentivirus group         | 302   |
| Viruses_dsDNA viruses, no RNA stage_Poxviridae_eporipoxvirus                     | 296   |
| Viruses_dsDNA viruses, no RNA stage_Caudovirales_hiKZ-like viruses               |       |
| Viruses_dsDNA viruses, no RNA stage_Herpesvirales_Roseolovirus                   |       |
| Viruses_Retro-transcribing viruses_Hepadnaviridae_rthepadnavirus                 |       |



|                                                                                              |     |
|----------------------------------------------------------------------------------------------|-----|
| Viruses_dsDNA viruses, no RNA stage_Poxviridae_etaentomopoxvirus                             | 278 |
| Viruses_dsDNA viruses, no RNA stage_Papillomaviridae_lphapapillomavirus                      | 272 |
| Viruses_dsDNA viruses, no RNA stage_Herpesvirales_Lymphocryptovirus                          | 264 |
| Viruses_ssDNA viruses_Microviridae_Microvirus                                                | 254 |
| Viruses_dsDNA viruses, no RNA stage_Poxviridae_vipoxvirus                                    | 251 |
| Viruses_dsDNA viruses, no RNA stage_Caudovirales_5-like viruses                              | 247 |
| Viruses_dsDNA viruses, no RNA stage_Herpesvirales_Rhadinovirus                               | 237 |
| Viruses_dsDNA viruses, no RNA stage_Phycodnaviridae_Phaeovirus                               | 231 |
| Viruses_dsDNA viruses, no RNA stage_Caudovirales_xz1-like phages                             | 225 |
| Viruses_dsDNA viruses, no RNA stage_Caudovirales_unclassified_SPO1-like viruses              | 215 |
| Viruses_dsDNA viruses, no RNA stage_Caudovirales_PO1-like viruses                            | 204 |
| Viruses_dsRNA viruses_Reoviridae_otavirus A                                                  | 204 |
| Viruses_ssRNA positive-strand viruses, no DNA stage_Nidovirales_Betacoronavirus              | 204 |
| Viruses_dsDNA viruses, no RNA stage_Caudovirales_1-like viruses                              | 191 |
| Viruses_dsDNA viruses, no RNA stage_Caudovirales_T7-like viruses                             | 188 |
| Viruses_dsDNA viruses, no RNA stage_Herpesvirales_Muromegalovirus                            | 182 |
| Viruses_dsDNA viruses, no RNA stage_Caudovirales_Podoviridae                                 | 168 |
| Viruses_dsDNA viruses, no RNA stage_Poxviridae_eravidpoxvirus                                | 165 |
| Viruses_dsDNA viruses, no RNA stage_Poxviridae_olluscipoxvirus                               | 163 |
| Viruses_dsDNA viruses, no RNA stage_Herpesvirales_Simplexvirus                               | 147 |
| Viruses_dsDNA viruses, no RNA stage_Poxviridae_uipoxvirus                                    | 146 |
| Viruses_dsDNA viruses, no RNA stage_Baculoviridae_Betabaculovirus                            | 143 |
| Viruses_dsDNA viruses, no RNA stage_Poxviridae_atapoxvirus                                   | 140 |
| Viruses_dsDNA viruses, no RNA stage_Papillomaviridae_etapapillomavirus                       | 135 |
| Viruses_dsDNA viruses, no RNA stage_Poxviridae_arapoxvirus                                   | 129 |
| Viruses_dsDNA viruses, no RNA stage_Caudovirales_hieco32-like viruses                        | 128 |
| Viruses_dsDNA viruses, no RNA stage_Iridoviridae_Chloriridovirus                             | 126 |
| Viruses_ssDNA viruses_Geminiviridae_Begomovirus                                              | 126 |
| Viruses_dsDNA viruses, no RNA stage_Iridoviridae_infectious spleen and kidney necrosis virus | 125 |
| Viruses_dsDNA viruses, no RNA stage_Herpesvirales_Ostreavirus                                | 116 |
| Viruses_dsDNA viruses, no RNA stage_Caudovirales_utographivirinae                            | 112 |
| Viruses_dsDNA viruses, no RNA stage_Baculoviridae_Deltabaculovirus                           | 109 |
| Viruses_dsDNA viruses, no RNA stage_Iridoviridae_Ranavirus                                   | 96  |
| Viruses_dsDNA viruses, no RNA stage_Herpesvirales_Mardivirus                                 | 90  |
| Viruses_dsDNA viruses, no RNA stage_Baculoviridae_Gammabaculovirus                           | 89  |
| Viruses_ssRNA negative-strand viruses_Mononegavirales_Lyssavirus                             | 86  |
| Viruses_dsDNA viruses, no RNA stage_Caudovirales_22-like viruses                             | 83  |
| Viruses_dsDNA viruses, no RNA stage_Caudovirales_P2-like viruses                             | 79  |
| Viruses_dsDNA viruses, no RNA stage_Adenoviridae_Mastadenovirus                              | 78  |
| Viruses_dsDNA viruses, no RNA stage_Herpesvirales_Percavirus                                 | 77  |
| Viruses_dsDNA viruses, no RNA stage_Herpesvirales_Ictalurivirus                              | 76  |
| Viruses_dsDNA viruses, no RNA stage_Lipothrixviridae_etaliptothrixvirus                      | 73  |
| Viruses_dsDNA viruses, no RNA stage_Herpesvirales_Iltovirus                                  | 71  |
| Viruses_dsDNA viruses, no RNA stage_Herpesvirales_Macavirus                                  | 70  |
| Viruses_ssRNA negative-strand viruses_Arenaviridae_ew world arenaviruses                     | 62  |
| Viruses_dsDNA viruses, no RNA stage_Polyomaviridae_Polyomavirus                              | 61  |
| Viruses_ssRNA positive-strand viruses, no DNA stage_Virgaviridae_obamovirus                  | 60  |
| Viruses_ssRNA positive-strand viruses, no DNA stage_Tymovirales_Potexvirus                   | 59  |
| Viruses_dsDNA viruses, no RNA stage_Caudovirales_15-like viruses                             | 58  |
| Viruses_dsDNA viruses, no RNA stage_Caudovirales_ambda-like viruses                          | 58  |
| Viruses_dsDNA viruses, no RNA stage_Adenoviridae_uman adenovirus B                           | 55  |
| Viruses_dsDNA viruses, no RNA stage_Ampullaviridae_Ampullavirus                              | 54  |
| Viruses_ssDNA viruses_Geminiviridae_Mastrevirus                                              | 53  |
| Viruses_dsDNA viruses, no RNA stage_Caudovirales_hiC31-like viruses                          | 52  |
| Viruses_dsDNA viruses, no RNA stage_Lipothrixviridae_etalipthrixvirus                        | 52  |
| Viruses_Retro-transcribing viruses_Caulimoviridae_Caulimovirus                               | 52  |
| Viruses_ssRNA positive-strand viruses, no DNA stage_Potyviridae_otyvirus                     | 49  |
| Viruses_dsDNA viruses, no RNA stage_Globuloviridae_Globulovirus                              | 48  |
| Viruses_ssRNA negative-strand viruses_Mononegavirales_Vesiculovirus                          | 47  |
| Viruses_ssRNA negative-strand viruses_Mononegavirales_bolavirus                              | 46  |
| Viruses_ssRNA negative-strand viruses_Mononegavirales_Morbillivirus                          | 46  |
| Viruses_ssDNA viruses_Nanoviridae_Nanovirus                                                  | 44  |
| Viruses_ssRNA positive-strand viruses, no DNA stage_Nidovirales_Alphacoronavirus             | 41  |
| Viruses_dsDNA viruses, no RNA stage_Lipothrixviridae_ammalipthrixvirus                       | 40  |
| Viruses_dsDNA viruses, no RNA stage_Papillomaviridae_eltapapillomavirus                      | 40  |
| Viruses_ssDNA viruses_Inoviridae_Inovirus                                                    | 40  |
| Viruses_dsDNA viruses, no RNA stage_Adenoviridae_owl adenovirus A                            | 39  |
| Viruses_dsDNA viruses, no RNA stage_Caudovirales_2-like viruses                              | 38  |
| Viruses_ssRNA negative-strand viruses_Mononegavirales_Respirovirus                           | 38  |
| Viruses_dsDNA viruses, no RNA stage_Lipothrixviridae_lphalipthrixvirus                       | 37  |
| Viruses_dsDNA viruses, no RNA stage_Tectiviridae_Tectivirus                                  | 36  |
| Viruses_Retro-transcribing viruses_Retroviridae_eltaretrovirus                               | 36  |
| Viruses_ssRNA negative-strand viruses_Mononegavirales_arburgvirus                            | 35  |
| Viruses_ssRNA negative-strand viruses_Mononegavirales_Pneumovirus                            | 35  |
| Viruses_Deltavirus_C Viruses_Deltavirus                                                      | 34  |
| Viruses_ssDNA viruses_Anelloviridae_unclassified_Anelloviridae                               | 34  |
| Viruses_dsRNA viruses_Reoviridae_Orthoreovirus                                               | 33  |
| Viruses_dsRNA viruses_Reoviridae_Rotavirus                                                   | 33  |
| Viruses_ssRNA positive-strand viruses, no DNA stage_Flaviviridae_epacivirus                  | 32  |
| Viruses_ssRNA negative-strand viruses_Mononegavirales_Rubulavirus                            | 31  |
| Viruses_Retro-transcribing viruses_Hepadnaviridae_Avihepadnavirus                            | 30  |
| Viruses_ssRNA positive-strand viruses, no DNA stage_Hepeviridae_epevirus                     | 30  |
| Viruses_dsDNA viruses, no RNA stage_Caudovirales_Phi29-like viruses                          | 28  |
| Viruses_Retro-transcribing viruses_Retroviridae_etaretrovirus                                | 27  |
| Viruses_Retro-transcribing viruses_Retroviridae_pumavirus                                    | 27  |
| Viruses_dsDNA viruses, no RNA stage_Papillomaviridae_upapillomavirus                         | 26  |
| Viruses_ssDNA viruses_Parvoviridae_Parvovirus                                                | 25  |
| Viruses_ssRNA negative-strand viruses_Mononegavirales_Nucleorhabdovirus                      | 25  |
| Viruses_dsRNA viruses_Reoviridae_Phytoreovirus                                               | 24  |
| Viruses_ssRNA negative-strand viruses_Mononegavirales_Novirhabdovirus                        | 24  |
| Viruses_ssRNA positive-strand viruses, no DNA stage_Nidovirales_Arterivirus                  | 24  |
| Viruses_dsDNA viruses, no RNA stage_Adenoviridae_Siadenovirus                                | 23  |
| Viruses_dsRNA viruses_Reoviridae_Mycoreovirus                                                | 23  |
| Viruses_ssRNA positive-strand viruses, no DNA stage_Luteoviridae_olerovirus                  | 23  |
| Viruses_dsDNA viruses, no RNA stage_Caudovirales_AHJD-like viruses                           | 21  |
| Viruses_ssDNA viruses_Circoviridae_Circovirus                                                | 21  |

|                                                                                                  |    |
|--------------------------------------------------------------------------------------------------|----|
| <i>Viruses_unclassified virophages_C</i>                                                         | 21 |
| <i>Viruses_unclassified virophages</i>                                                           | 21 |
| <i>Viruses_ssRNA positive-strand viruses, no DNA stage_Flaviviridae_Dengue virus group</i>       | 20 |
| <i>Viruses_ssRNA positive-strand viruses, no DNA stage_Nidovirales_Gammacoronavirus</i>          | 20 |
| <i>Viruses_ssRNA positive-strand viruses, no DNA stage_Togaviridae_SFV complex</i>               | 20 |
| <i>Viruses_dsDNA viruses, no RNA stage_Papillomaviridae_ipapillomavirus</i>                      | 19 |
| <i>Viruses_ssRNA positive-strand viruses, no DNA stage_Picornavirales_Human enterovirus B</i>    | 19 |
| <i>Viruses_Retro-transcribing viruses_Retroviridae_Murine leukemia virus</i>                     | 18 |
| <i>Viruses_ssRNA negative-strand viruses_Mononegavirales_Henipavirus</i>                         | 18 |
| <i>Viruses_ssRNA negative-strand viruses_Mononegavirales_Metapneumovirus</i>                     | 18 |
| <i>Viruses_ssRNA positive-strand viruses, no DNA stage_Astroviridae_astrovirus</i>               | 18 |
| <i>Viruses_ssRNA positive-strand viruses, no DNA stage_Caliciviridae_esivirus</i>                | 18 |
| <i>Viruses_ssRNA positive-strand viruses, no DNA stage_Togaviridae_ubivirus</i>                  | 18 |
| <i>Viruses_ssDNA viruses_Circoviridae_Gyrovirus</i>                                              | 16 |
| <i>Viruses_ssRNA positive-strand viruses, no DNA stage_Bromoviridae_ucumovirus</i>               | 16 |
| <i>Viruses_dsDNA viruses, no RNA stage_Papillomaviridae_ammappapillomavirus</i>                  | 14 |
| <i>Viruses_ssRNA negative-strand viruses_Mononegavirales_Cytorhabdovirus</i>                     | 14 |
| <i>Viruses_ssRNA positive-strand viruses, no DNA stage_Leviviridae_evivirus</i>                  | 14 |
| <i>Viruses_ssRNA positive-strand viruses, no DNA stage_Tombusviridae_ombusvirus</i>              | 14 |
| <i>Viruses_dsRNA viruses_Reoviridae_Coltivirus</i>                                               | 13 |
| <i>Viruses_ssRNA positive-strand viruses, no DNA stage_Closteroviridae_mpeovirus</i>             | 13 |
| <i>Viruses_dsRNA viruses_Reoviridae_Aquareovirus</i>                                             | 12 |
| <i>Viruses_dsRNA viruses_Reoviridae_ijivirus group</i>                                           | 12 |
| <i>Viruses_dsRNA viruses_Reoviridae_nclassified Aquareovirus</i>                                 | 12 |
| <i>Viruses_dsRNA viruses_Reoviridae_Seadomavirus</i>                                             | 12 |
| <i>Viruses_Retro-transcribing viruses_Retroviridae_ammaretrovirus</i>                            | 12 |
| <i>Viruses_ssRNA negative-strand viruses_Arenaviridae_Id world arenaviruses</i>                  | 12 |
| <i>Viruses_ssRNA negative-strand viruses_Mononegavirales_Ephemerovirus</i>                       | 12 |
| <i>Viruses_ssRNA positive-strand viruses, no DNA stage_Bromoviridae_romovirus</i>                | 12 |
| <i>Viruses_ssRNA positive-strand viruses, no DNA stage_Sobemovirus_Sobemovirus</i>               | 12 |
| <i>Viruses_ssRNA positive-strand viruses, no DNA stage_Tymovirales_Tymovirus</i>                 | 12 |
| <i>Viruses_dsRNA viruses_Reoviridae_Mimoreovirus</i>                                             | 11 |
| <i>Viruses_dsRNA viruses_Reoviridae_nclassified rotaviruses</i>                                  | 11 |
| <i>Viruses_dsRNA viruses_Reoviridae_Orbivirus</i>                                                | 11 |
| <i>Viruses_dsRNA viruses_Reoviridae_Oryzavirus</i>                                               | 11 |
| <i>Viruses_ssRNA negative-strand viruses_Mononegavirales_ornavirus</i>                           | 11 |
| <i>Viruses_ssRNA negative-strand viruses_Ophioviridae_Ophiovirus</i>                             | 11 |
| <i>Viruses_ssRNA negative-strand viruses_Orthomyxoviridae_nfluenzavirus B</i>                    | 11 |
| <i>Viruses_ssRNA positive-strand viruses, no DNA stage_Picornavirales_Comovirus</i>              | 11 |
| <i>Viruses_ssRNA positive-strand viruses, no DNA stage_Picornavirales_Hepatovirus</i>            | 11 |
| <i>Viruses_dsRNA viruses_Reoviridae_Cypovirus</i>                                                | 10 |
| <i>Viruses_Retro-transcribing viruses_Retroviridae_lpharetrovirus</i>                            | 10 |
| <i>Viruses_ssDNA viruses_Parvoviridae_Densovirus</i>                                             | 10 |
| <i>Viruses_ssRNA positive-strand viruses, no DNA stage_Nidovirales_Coronavirus group 2c</i>      | 10 |
| <i>Viruses_dsRNA viruses_Reoviridae_Dinovemavirus</i>                                            | 9  |
| <i>Viruses_Retro-transcribing viruses_Caulimoviridae_Soymovirus</i>                              | 9  |
| <i>Viruses_ssDNA viruses_Geminiviridae_Curtovirus</i>                                            | 9  |
| <i>Viruses_ssRNA negative-strand viruses_Bunyaviridae_Hantavirus</i>                             | 9  |
| <i>Viruses_ssRNA positive-strand viruses, no DNA stage_Astroviridae_vastrovirus</i>              | 9  |
| <i>Viruses_ssRNA positive-strand viruses, no DNA stage_Benyvirus_Benyvirus</i>                   | 9  |
| <i>Viruses_ssRNA positive-strand viruses, no DNA stage_Flaviviridae_Yellow fever virus group</i> | 9  |
| <i>Viruses_ssRNA positive-strand viruses, no DNA stage_Picornavirales_Aphthovirus</i>            | 9  |
| <i>Viruses_ssRNA positive-strand viruses, no DNA stage_Potyviridae_ymovirus</i>                  | 9  |
| <i>Viruses_ssRNA positive-strand viruses, no DNA stage_Togaviridae_VEEV complex</i>              | 9  |
| <i>Viruses_dsDNA viruses, no RNA stage_Papillomaviridae_appapapillomavirus</i>                   | 8  |
| <i>Viruses_dsDNA viruses, no RNA stage_Papillomaviridae_mikronpapillomavirus</i>                 | 8  |
| <i>Viruses_ssRNA negative-strand viruses_Bunyaviridae_Orthobunyavirus</i>                        | 8  |
| <i>Viruses_ssRNA negative-strand viruses_Bunyaviridae_Phlebovirus</i>                            | 8  |
| <i>Viruses_ssRNA negative-strand viruses_Mononegavirales_Avulavirus</i>                          | 8  |
| <i>Viruses_ssRNA negative-strand viruses_Orthomyxoviridae_nfluenzavirus C</i>                    | 8  |
| <i>Viruses_ssRNA positive-strand viruses, no DNA stage_Closteroviridae_losteroovirus</i>         | 8  |
| <i>Viruses_ssRNA positive-strand viruses, no DNA stage_Closteroviridae_rinivirus</i>             | 8  |
| <i>Viruses_ssRNA positive-strand viruses, no DNA stage_Picornavirales_Cardiovirus</i>            | 8  |
| <i>Viruses_ssRNA positive-strand viruses, no DNA stage_Picornavirales_Human enterovirus C</i>    | 8  |
| <i>Viruses_ssRNA positive-strand viruses, no DNA stage_Togaviridae_lphavirus</i>                 | 8  |
| <i>Viruses_ssRNA positive-strand viruses, no DNA stage_Tombusviridae_armovirus</i>               | 8  |
| <i>Viruses_dsDNA viruses, no RNA stage_Papillomaviridae_ambdapapillomavirus</i>                  | 7  |
| <i>Viruses_dsDNA viruses, no RNA stage_Papillomaviridae_otapapillomavirus</i>                    | 7  |
| <i>Viruses_dsDNA viruses, no RNA stage_Papillomaviridae_pstilonpapillomavirus</i>                | 7  |
| <i>Viruses_ssDNA viruses_Nanoviridae_Babuvirus</i>                                               | 7  |
| <i>Viruses_ssDNA viruses_Parvoviridae_Erythrovirus</i>                                           | 7  |
| <i>Viruses_ssDNA viruses_Parvoviridae_nclassified Densovirinae</i>                               | 7  |
| <i>Viruses_ssDNA viruses_Parvoviridae_Pefudensovirus</i>                                         | 7  |
| <i>Viruses_ssRNA negative-strand viruses_Orthomyxoviridae_hogotovirus</i>                        | 7  |
| <i>Viruses_ssRNA negative-strand viruses_Tenuivirus_Tenuivirus</i>                               | 7  |
| <i>Viruses_ssRNA positive-strand viruses, no DNA stage_Caliciviridae_agovirus</i>                | 7  |
| <i>Viruses_ssRNA positive-strand viruses, no DNA stage_Nidovirales_Equine torovirus</i>          | 7  |
| <i>Viruses_ssRNA positive-strand viruses, no DNA stage_Picornavirales_Subgroup A</i>             | 7  |
| <i>Viruses_ssRNA positive-strand viruses, no DNA stage_Picornavirales_Subgroup B</i>             | 7  |
| <i>Viruses_ssRNA positive-strand viruses, no DNA stage_Togaviridae_WEEV complex</i>              | 7  |
| <i>Viruses_ssRNA positive-strand viruses, no DNA stage_Tombusviridae_ianthovirus</i>             | 7  |
| <i>Viruses_ssRNA positive-strand viruses, no DNA stage_Virgaviridae_ecluvirus</i>                | 7  |
| <i>Viruses_ssRNA positive-strand viruses, no DNA stage_Virgaviridae_omovirus</i>                 | 7  |
| <i>Viruses_ssRNA positive-strand viruses, no DNA stage_Virgaviridae_ordeivirus</i>               | 7  |
| <i>Viruses_dsDNA viruses, no RNA stage_Papillomaviridae_hetapapillomavirus</i>                   | 6  |
| <i>Viruses_dsDNA viruses, no RNA stage_Papillomaviridae_tapapillomavirus</i>                     | 6  |
| <i>Viruses_dsRNA viruses_Birnaviridae_Aquabirnavirus</i>                                         | 6  |
| <i>Viruses_dsRNA viruses_Birnaviridae_Avibirnavirus</i>                                          | 6  |
| <i>Viruses_Retro-transcribing viruses_Retroviridae_psilonretrovirus</i>                          | 6  |
| <i>Viruses_Retro-transcribing viruses_Retroviridae_unclassified Gammaretrovirus</i>              | 6  |
| <i>Viruses_ssDNA viruses_Geminiviridae_Topocavirus</i>                                           | 6  |
| <i>Viruses_ssRNA negative-strand viruses_Bunyaviridae_Nairovirus</i>                             | 6  |
| <i>Viruses_ssRNA negative-strand viruses_Varicosavirus_Varicosavirus</i>                         | 6  |
| <i>Viruses_ssRNA positive-strand viruses, no DNA stage_C</i>                                     | 6  |
| <i>Viruses_ssRNA positive-strand viruses, no DNA stage</i>                                       | 6  |
| <i>Viruses_ssRNA positive-strand viruses, no DNA stage_Caliciviridae_apovirus</i>                | 6  |
| <i>Viruses_ssRNA positive-strand viruses, no DNA stage_Caliciviridae_orovirus</i>                | 6  |

|                                                                                                             |   |
|-------------------------------------------------------------------------------------------------------------|---|
| <i>Viruses_ssRNA positive-strand viruses, no DNA stage_Flaviviridae_tick-borne encephalitis virus group</i> | 6 |
| <i>Viruses_ssRNA positive-strand viruses, no DNA stage_Luteoviridae_uteovirus</i>                           | 6 |
| <i>Viruses_ssRNA positive-strand viruses, no DNA stage_Nidovirales_Torovirus</i>                            | 6 |
| <i>Viruses_ssRNA positive-strand viruses, no DNA stage_Picomavirales_Subgroup C</i>                         | 6 |
| <i>Viruses_ssRNA positive-strand viruses, no DNA stage_Togaviridae_EEEV complex</i>                         | 6 |
| <i>Viruses_ssRNA positive-strand viruses, no DNA stage_Tymovirales_Allexivirus</i>                          | 6 |
| <i>Viruses_ssRNA positive-strand viruses, no DNA stage_Tymovirales_Carlavirus</i>                           | 6 |
| <i>Viruses_ssRNA positive-strand viruses, no DNA stage_Tymovirales_Lolavirus</i>                            | 6 |
| <i>Viruses_ssRNA positive-strand viruses, no DNA stage_Tymovirales_Mandarivirus</i>                         | 6 |
| <i>Viruses_ssRNA positive-strand viruses, no DNA stage_Tymovirales_Trichovirus</i>                          | 6 |
| <i>Viruses_ssRNA positive-strand viruses, no DNA stage_Virgaviridae_obravirus</i>                           | 6 |
| <i>Viruses_dsDNA viruses, no RNA stage_Polydnviridae_Ichnovirus</i>                                         | 5 |
| <i>Viruses_Retro-transcribing viruses_Caulimoviridae_Cavemovirus</i>                                        | 5 |
| <i>Viruses_ssDNA viruses_Circoviridae_nclassified_Circovirus</i>                                            | 5 |
| <i>Viruses_ssDNA viruses_Parvoviridae_Brevdensovirus</i>                                                    | 5 |
| <i>Viruses_ssRNA negative-strand viruses_Bunyaviridae_Tospovirus</i>                                        | 5 |
| <i>Viruses_ssRNA positive-strand viruses, no DNA stage_Bromoviridae_Iarvirus</i>                            | 5 |
| <i>Viruses_ssRNA positive-strand viruses, no DNA stage_Flaviviridae_estivirus</i>                           | 5 |
| <i>Viruses_ssRNA positive-strand viruses, no DNA stage_Flaviviridae_Japanese encephalitis virus group</i>   | 5 |
| <i>Viruses_ssRNA positive-strand viruses, no DNA stage_Luteoviridae_namovirus</i>                           | 5 |
| <i>Viruses_ssRNA positive-strand viruses, no DNA stage_Nidovirales_Bafinivirus</i>                          | 5 |
| <i>Viruses_ssRNA positive-strand viruses, no DNA stage_Nidovirales_Okavirus</i>                             | 5 |
| <i>Viruses_ssRNA positive-strand viruses, no DNA stage_Tombusviridae_anicovirus</i>                         | 5 |
| <i>Viruses_ssRNA positive-strand viruses, no DNA stage_Tombusviridae_ecrovirus</i>                          | 5 |
| <i>Viruses_ssRNA positive-strand viruses, no DNA stage_Tymovirales_Botrexvirus</i>                          | 5 |
| <i>Viruses_ssRNA positive-strand viruses, no DNA stage_Tymovirales_Foveavirus</i>                           | 5 |
| <i>Viruses_ssRNA positive-strand viruses, no DNA stage_Tymovirales_Vitivirus</i>                            | 5 |
| <i>Viruses_ssRNA positive-strand viruses, no DNA stage_Virgaviridae_urovirus</i>                            | 5 |
| <i>Viruses_dsDNA viruses, no RNA stage_Phycodnaviridae_Raphidovirus</i>                                     | 4 |
| <i>Viruses_dsRNA viruses_Chrysoviridae_Chrysovirus</i>                                                      | 4 |
| <i>Viruses_dsRNA viruses_Hypoviridae_Hypovirus</i>                                                          | 4 |
| <i>Viruses_Retro-transcribing viruses_Caulimoviridae_Tungrovirus</i>                                        | 4 |
| <i>Viruses_ssDNA viruses_Anelloviridae_Epsilontorquevirus</i>                                               | 4 |
| <i>Viruses_ssDNA viruses_Parvoviridae_Amdovirus</i>                                                         | 4 |
| <i>Viruses_ssRNA positive-strand viruses, no DNA stage_Barnaviridae_arnavirus</i>                           | 4 |
| <i>Viruses_ssRNA positive-strand viruses, no DNA stage_Bromoviridae_leavirus</i>                            | 4 |
| <i>Viruses_ssRNA positive-strand viruses, no DNA stage_Bromoviridae_Ifamovirus</i>                          | 4 |
| <i>Viruses_ssRNA positive-strand viruses, no DNA stage_Bromoviridae_nulavirus</i>                           | 4 |
| <i>Viruses_ssRNA positive-strand viruses, no DNA stage_Caliciviridae_ebovirus</i>                           | 4 |
| <i>Viruses_ssRNA positive-strand viruses, no DNA stage_Picomavirales_Human enterovirus A</i>                | 4 |
| <i>Viruses_ssRNA positive-strand viruses, no DNA stage_Picomavirales_Human rhinovirus A</i>                 | 4 |
| <i>Viruses_ssRNA positive-strand viruses, no DNA stage_Polemovirus_Polemovirus</i>                          | 4 |
| <i>Viruses_ssRNA positive-strand viruses, no DNA stage_Tombusviridae_achlomovirus</i>                       | 4 |
| <i>Viruses_ssRNA positive-strand viruses, no DNA stage_Tombusviridae_ureusvirus</i>                         | 4 |
| <i>Viruses_ssRNA positive-strand viruses, no DNA stage_Tymovirales_Maculavirus</i>                          | 4 |
| <i>Viruses_unassigned ssRNA viruses_Emaravirus_Emaravirus</i>                                               | 4 |
| <i>Viruses_dsRNA viruses_Birnaviridae_Blosnavirus</i>                                                       | 3 |
| <i>Viruses_dsRNA viruses_Birnaviridae_Entomobirnavirus</i>                                                  | 3 |
| <i>Viruses_dsRNA viruses_Picobirnaviridae_Picobirnavirus</i>                                                | 3 |
| <i>Viruses_dsRNA viruses_Totiviridae_Leishmanivirus</i>                                                     | 3 |
| <i>Viruses_Retro-transcribing viruses_Caulimoviridae_Badnavirus</i>                                         | 3 |
| <i>Viruses_ssDNA viruses_Anelloviridae_Betatorquevirus</i>                                                  | 3 |
| <i>Viruses_ssDNA viruses_Anelloviridae_Delatorquevirus</i>                                                  | 3 |
| <i>Viruses_ssDNA viruses_Anelloviridae_Etatorquevirus</i>                                                   | 3 |
| <i>Viruses_ssDNA viruses_Anelloviridae_Iotatorquevirus</i>                                                  | 3 |
| <i>Viruses_ssDNA viruses_Anelloviridae_Thetatorquevirus</i>                                                 | 3 |
| <i>Viruses_ssDNA viruses_Anelloviridae_Zetatorquevirus</i>                                                  | 3 |
| <i>Viruses_ssDNA viruses_Parvoviridae_Bocavirus</i>                                                         | 3 |
| <i>Viruses_ssDNA viruses_Parvoviridae_Dependovirus</i>                                                      | 3 |
| <i>Viruses_ssRNA positive-strand viruses, no DNA stage_Caliciviridae_Southampton virus</i>                  | 3 |
| <i>Viruses_ssRNA positive-strand viruses, no DNA stage_Idaeovirus_Idaeovirus</i>                            | 3 |
| <i>Viruses_ssRNA positive-strand viruses, no DNA stage_Nodaviridae_etanodavirus</i>                         | 3 |
| <i>Viruses_ssRNA positive-strand viruses, no DNA stage_Nodaviridae_Iphanodavirus</i>                        | 3 |
| <i>Viruses_ssRNA positive-strand viruses, no DNA stage_Ourmiavirus_Ourmiavirus</i>                          | 3 |
| <i>Viruses_ssRNA positive-strand viruses, no DNA stage_Picomavirales_Parechovirus</i>                       | 3 |
| <i>Viruses_ssRNA positive-strand viruses, no DNA stage_Picomavirales_Torradorvirus</i>                      | 3 |
| <i>Viruses_ssRNA positive-strand viruses, no DNA stage_Picomavirales_Tremovirus</i>                         | 3 |
| <i>Viruses_ssRNA positive-strand viruses, no DNA stage_Tetraviridae_megatetravirus</i>                      | 3 |
| <i>Viruses_ssRNA positive-strand viruses, no DNA stage_Tombusviridae_venavirus</i>                          | 3 |
| <i>Viruses_ssRNA positive-strand viruses, no DNA stage_Tymovirales_Citriovirus</i>                          | 3 |
| <i>Viruses_ssRNA positive-strand viruses, no DNA stage_Umbravirus_Umbravirus</i>                            | 3 |
| <i>Viruses_dsRNA viruses_Partitiviridae_Alphacryptovirus</i>                                                | 2 |
| <i>Viruses_dsRNA viruses_Partitiviridae_Cryspovirus</i>                                                     | 2 |
| <i>Viruses_dsRNA viruses_Totiviridae_Giardivirus</i>                                                        | 2 |
| <i>Viruses_dsRNA viruses_Totiviridae_Totivirus</i>                                                          | 2 |
| <i>Viruses_dsRNA viruses_Totiviridae_Victorivirus</i>                                                       | 2 |
| <i>Viruses_Retro-transcribing viruses_Caulimoviridae_Petivirus</i>                                          | 2 |
| <i>Viruses_ssDNA viruses_Anelloviridae_Alphatorquevirus</i>                                                 | 2 |
| <i>Viruses_ssDNA viruses_Anelloviridae_Gammatorquevirus</i>                                                 | 2 |
| <i>Viruses_ssRNA positive-strand viruses, no DNA stage_Flaviviridae_Hepatitis C virus subtype 3a</i>        | 2 |
| <i>Viruses_ssRNA positive-strand viruses, no DNA stage_Namaviridae_arnavirus</i>                            | 2 |
| <i>Viruses_ssRNA positive-strand viruses, no DNA stage_Picomavirales_Cheravirus</i>                         | 2 |
| <i>Viruses_ssRNA positive-strand viruses, no DNA stage_Picomavirales_Cripavirus</i>                         | 2 |
| <i>Viruses_ssRNA positive-strand viruses, no DNA stage_Picomavirales_Enterovirus</i>                        | 2 |
| <i>Viruses_ssRNA positive-strand viruses, no DNA stage_Picomavirales_Fabavirus</i>                          | 2 |
| <i>Viruses_ssRNA positive-strand viruses, no DNA stage_Picomavirales_Sadwavirus</i>                         | 2 |
| <i>Viruses_ssRNA positive-strand viruses, no DNA stage_Picomavirales_Waikavirus</i>                         | 2 |
| <i>Viruses_ssRNA positive-strand viruses, no DNA stage_Tetraviridae_etatetravirus</i>                       | 2 |
| <i>Viruses_ssRNA positive-strand viruses, no DNA stage_Tymovirales_Capillovirus</i>                         | 2 |
| <i>Viruses_ssRNA positive-strand viruses, no DNA stage_Tymovirales_Marafivirus</i>                          | 2 |
| <i>Viruses_ssRNA positive-strand viruses, no DNA stage_Tymovirales_Mycoflexivirus</i>                       | 2 |
| <i>Viruses_unclassified viruses_C Viruses_unclassified viruses</i>                                          | 2 |
| <i>Viruses_dsDNA viruses, no RNA stage_Iridoviridae_Lymphocystivirus</i>                                    | 1 |
| <i>Viruses_dsDNA viruses, no RNA stage_Polydnviridae_Bracovirus</i>                                         | 1 |

|                                                                                                        |   |
|--------------------------------------------------------------------------------------------------------|---|
| <i>Viruses_dsRNA viruses_Endonaviridae_Endonavirus</i>                                                 | 1 |
| <i>Viruses_ssRNA positive-strand viruses, no DNA stage_Flaviviridae_Hepatitis C virus subtype 4a</i>   | 1 |
| <i>Viruses_ssRNA positive-strand viruses, no DNA stage_Flaviviridae_Iavivirus</i>                      | 1 |
| <i>Viruses_ssRNA positive-strand viruses, no DNA stage_Flaviviridaeurray Valley encephalitis virus</i> | 1 |
| <i>Viruses_ssRNA positive-strand viruses, no DNA stage_Namaviridae_unclassified Mitovirus</i>          | 1 |
| <i>Viruses_ssRNA positive-strand viruses, no DNA stage_Picornavirales_Avihepatovirus</i>               | 1 |
| <i>Viruses_ssRNA positive-strand viruses, no DNA stage_Picornavirales_Erbovirus</i>                    | 1 |
| <i>Viruses_ssRNA positive-strand viruses, no DNA stage_Picornavirales_Human enterovirus D</i>          | 1 |
| <i>Viruses_ssRNA positive-strand viruses, no DNA stage_Picornavirales_Iflavirus</i>                    | 1 |
| <i>Viruses_ssRNA positive-strand viruses, no DNA stage_Picornavirales_Kobuvirus</i>                    | 1 |
| <i>Viruses_ssRNA positive-strand viruses, no DNA stage_Picornavirales_Mamavirus</i>                    | 1 |
| <i>Viruses_ssRNA positive-strand viruses, no DNA stage_Picornavirales_Porcine enterovirus B</i>        | 1 |
| <i>Viruses_ssRNA positive-strand viruses, no DNA stage_Picornavirales_Porcine sapelovirus</i>          | 1 |
| <i>Viruses_ssRNA positive-strand viruses, no DNA stage_Picornavirales_Senecavirus</i>                  | 1 |
| <i>Viruses_ssRNA positive-strand viruses, no DNA stage_Picornavirales_Sequivirus</i>                   | 1 |
| <i>Viruses_ssRNA positive-strand viruses, no DNA stage_Picornavirales_Teschovirus</i>                  | 1 |
| <i>Viruses_ssRNA positive-strand viruses, no DNA stage_Potyviridae_pomovirus</i>                       | 1 |
| <i>Viruses_ssRNA positive-strand viruses, no DNA stage_Potyviridae_Potyviridae</i>                     | 1 |
| <i>Viruses_ssRNA positive-strand viruses, no DNA stage_Potyviridae_rambyvirus</i>                      | 1 |
| <i>Viruses_ssRNA positive-strand viruses, no DNA stage_Potyviridae_ritimovirus</i>                     | 1 |
| <i>Viruses_ssRNA positive-strand viruses, no DNA stage_Tymovirales_Sclerodarnavirus</i>                | 1 |

---
